# Supplementary material for: Efficient Screening of Metal Promoters of Pt Catalysts for C–H Bond Activation in Propane Dehydrogenation from a Combined First-Principles Calculations and Machine-Learning Study
Source: PubMed Central journal article supplement — ACS Omega. 2023 Jun 21;8(26):23982–90. doi: 10.1021/acsomega.3c02675 (PMC10324074; doi:10.1021/acsomega.3c02675), 2023-06-21
Supplement: ao3c02675_si_001.pdf [file ao3c02675_si_001.pdf]

## Supporting Information

### **Efficient Screening of Metal Promoters of Pt Catalyst for C-H bond Activation in Propane Dehydrogenation from a Combined First-Principles Calculations and Machine Learning Study**

Nuodan Zhou<sup>a,b</sup>, Wen Liu<sup>d</sup>, Faheem Jan<sup>a,b</sup>, ZhongKang Han<sup>d\*</sup>, Bo Li<sup>c\*</sup>

<sup>a</sup> Shenyang National Laboratory for Materials Science, Institute of Metal Research, Chinese Academy of Sciences, Shenyang 110016, Liaoning, People's Republic of China

<sup>b</sup> School of Materials Science and Engineering, University of Science and Technology of China, Shenyang 110016, Liaoning, People's Republic of China

<sup>c</sup> Institute of Catalysis for Energy and Environment, College of Chemistry and Chemical Engineering, Shenyang Normal University, Shenyang 110034, China

<sup>d</sup> School of Materials Science and Engineering, Zhejiang University, Hangzhou, 310027, China

Corresponding Author

\* B. Li: boli@synu.edu.cn

\*Z.K. Han: hanzk@zju.edu.cn

## **Note S1. Detail process of ML-DFT**

**(1) Data collection:** The adsorption energy and reaction energy were calculated from DFT calculations. The complete adsorption energy data was listed in Table S1. CINEB was used to calculate the activation energy barrier of C-H bond, as shown in Table S2. The rest energy barrier values were obtained by BEP rules as shown in Figure S4. The complete reaction barriers are shown in Table S3.

**(2) Data preprocessing:** Normalized and preprocessed the DFT data we calculated. Scale the data so that it falls into small, specific intervals with the help of StandardScaler. Removed the unit restriction of data and converted into a dimensionless pure value, which is convenient for the comparison of indicators of different units and magnitudes.

**(3) Feature engineering:** Select 21 features that can describe the characteristics of the system as illustrated in Table S5, Pearson relation is used to get rid of the feature of high linear correlation coefficient as shown in Table S7

**(4) Model construction:** The input data collected from DFT computations were randomly shuffled and divided into the training set and test set with a 8:2 ratio. To reduce the risk of overfitting, the test data set is reproduced by adding uniformly distributed random noises in the scale of -2% to 2% of the test set, and the training procedure is executed 500 times for each ML model. Analyzed the train set of the preprocessed data by four ML regression algorithms including GBR, KNR, RFR, and ABR, select the model with the least error and the best performance.

**(5) Model prediction :** The optimal model selected is used for prediction, and the prediction results are shown in the Table S8.

## Note S2. The calculated lattice constants

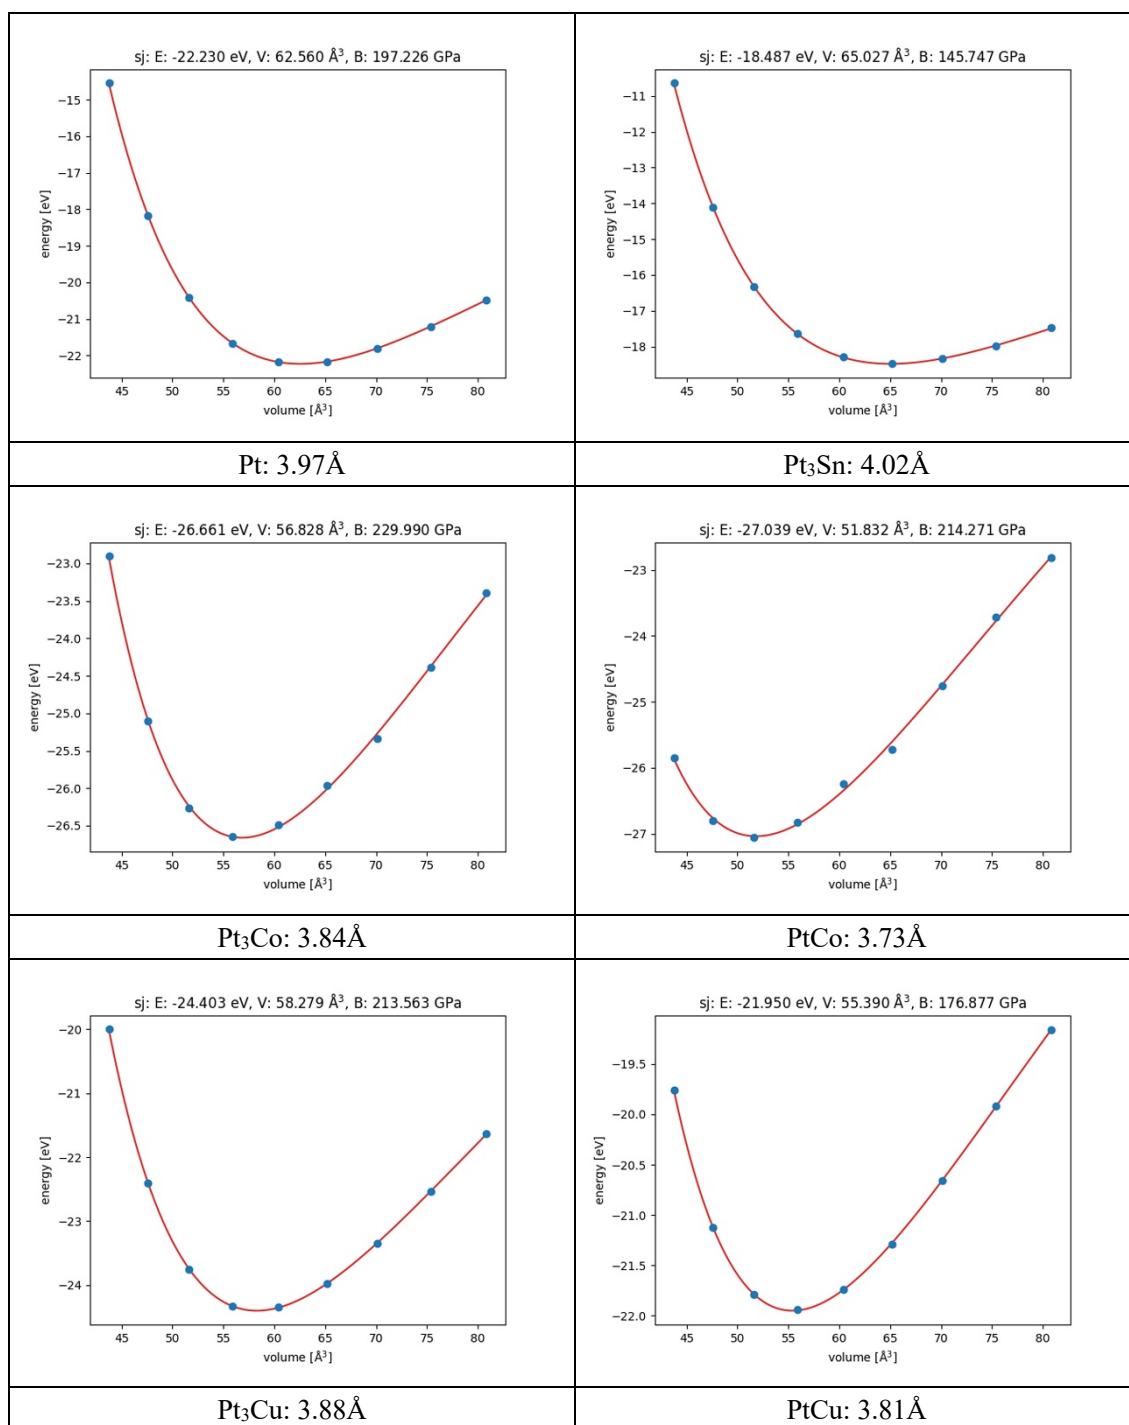

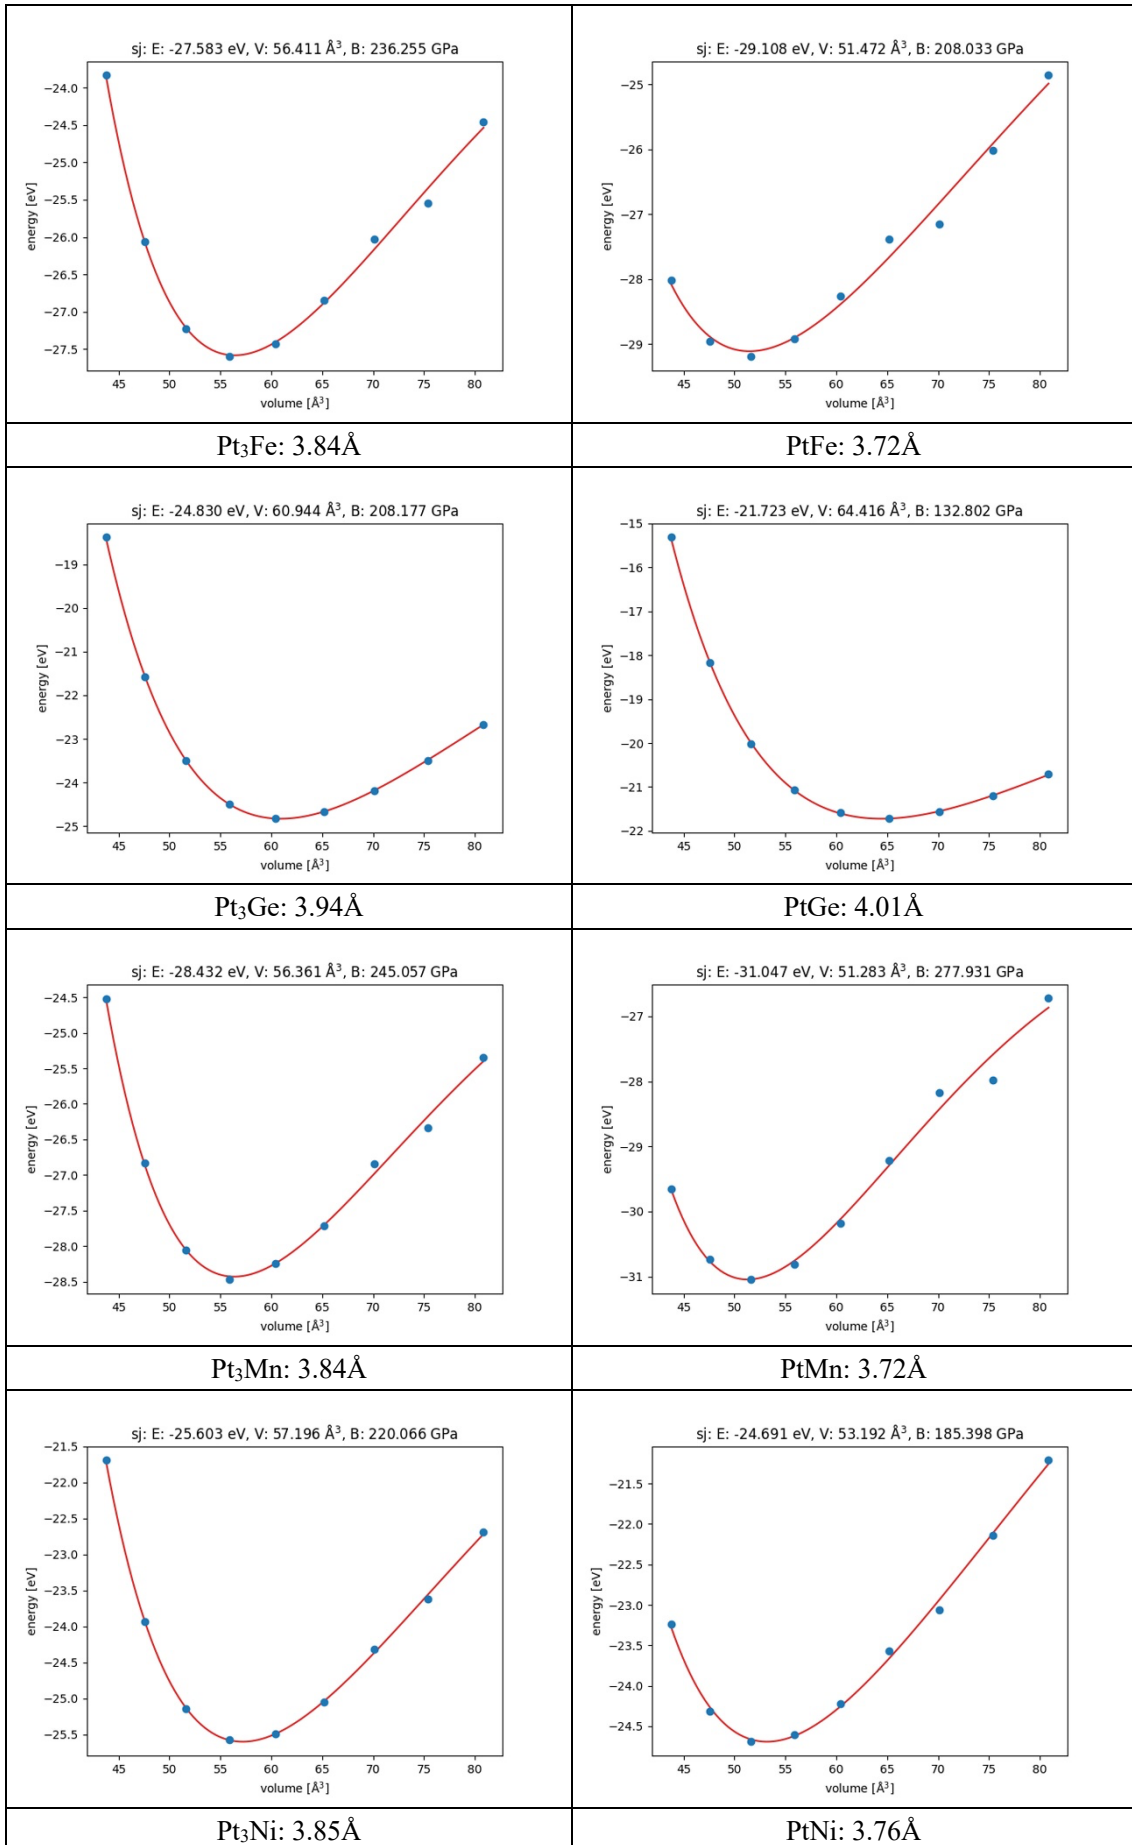

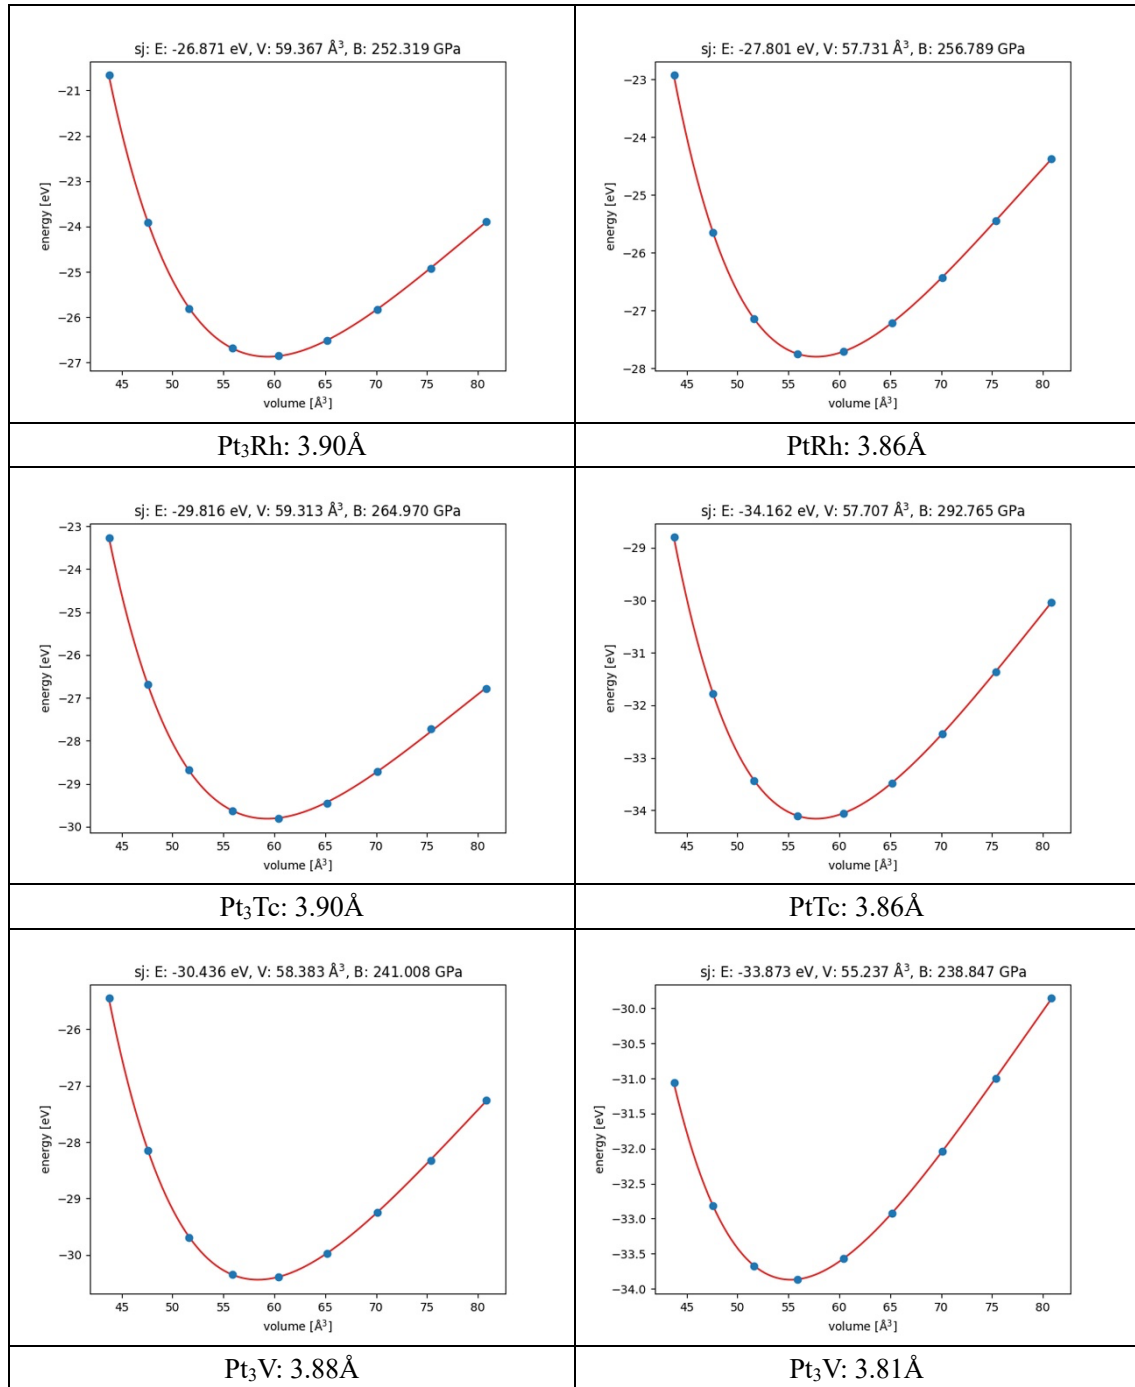

### Note S3. The computational method of GBR regression algorithm

The best performing **Gradient Boosted Regression (GBR)** model is an integrated ML algorithm that is generated by the integration of weak regression trees. Given the training samples  $D = \{(\mathbf{x}_1, \mathbf{y}_1), (\mathbf{x}_2, \mathbf{y}_2) \dots, (\mathbf{x}_n, \mathbf{y}_n)\}$ , the number of leaf nodes in every regression tree is  $J$ . We divided the input data into  $J$  disjoint areas and defined each regression tree as  $t_m(\mathbf{x})$ . The training goal of GBR is to minimize the loss function  $L$ , and the parameters of decision tree  $\theta_m$  are determined through empirical risk

minimization:

$$\theta_m = \underset{\theta_m}{\operatorname{argmin}} \sum_{i=1}^n L(y_i, f_{(m-1)}(x_i) + t_m(x_i)) \quad (\text{S1})$$

The process of GBR training is as follows:

- (a) Initialize a regression tree function  $f_0(x)$ .
- (b) Train GBR in the gradient decline direction, and compute the negative gradient value of the loss function as the estimated value of the residual. For the  $m$ th iteration, GBR generates a regression tree according to the residual and updates the current function  $f_m(x)$ .
- (c) The final regression model is the weighted sum of several weak regression trees, which is defined as:-

$$f_M(x) = \sum_{m=1}^M t(x, \theta_m) \quad (\text{S2})$$

#### **Note S4. The computational method of RFR regression algorithm**

The Random Forest Regression (RFR) model are an ensemble learning method for regression by constructing a multitude of decision trees at training time and outputting the class that is the mode of the classes (classification) or mean/average prediction (regression) of the individual trees. Random decision forests correct for decision trees' habit of overfitting to their training set. The training algorithm for random forests applies the general technique of bootstrap aggregating, or bagging, to tree learners. Given a training set  $X = x_1 \dots x_n$  with responses  $Y = y_1 \dots y_n$ , bagging repeatedly (B times) selects a random sample with replacement of the training set and fits trees to these samples:

- (a) For  $b = 1 \dots B$ : Sample, with replacement,  $n$  training examples from  $X, Y$ ; call these  $X_b, Y_b$ ; Train a regression tree  $f_b$  on  $X_b, Y_b$ .
- (b) After training, predictions for unseen samples  $x'$  can be made by averaging the predictions from all the individual regression trees on  $x'$

$$\hat{f} = \frac{1}{B} \sum_{b=1}^B f_b(x') \quad (\text{S3})$$

#### **Note S5. The computational method of KNR regression algorithm**

The **K-Neighbor Regression (KNR)** model is a non-parametric method proposed by Thomas Cover used for classification and regression. In both cases, the input consists of the k closest training examples in the feature space. The output depends on whether k-NN is used for classification or regression. In k-NN regression, the output is the property value for the object. This value is the average of the values of k nearest neighbors. In the classification phase, k is a user-defined constant, and an unlabeled vector (a query or test point) is classified by assigning the label which is most frequent among the k training samples nearest to that query point. A commonly used distance metric for continuous variables is Euclidean distance. For discrete variables, such as for text classification, another metric can be used, such as the overlap metric (or Hamming distance). Often, the classification accuracy of k-NN can be improved significantly if the distance metric is learned with specialized algorithms such as Large Margin Nearest Neighbor or Neighborhood components analysis. This algorithm works as follows:

- (a) Compute the Euclidean or Mahalanobis distance from the query example to the labeled examples.
- (b) Order the labeled examples by increasing distance.
- (c) Find a heuristically optimal number k of nearest neighbors, based on RMSE. This is done using cross validation.
- (d) Calculate an inverse distance weighted average with the k-nearest multivariate neighbors

**Note S6. The computational method of ABR regression algorithm**

In each iteration, the weight of the data misclassified by the previous classifier is improved, while the weight of the data correctly classified is reduced. Finally, AdaBoost takes the linear combination of basic classifiers as a strong classifier, in which the basic classifier with a small classification error rate is given large weights and the basic classifier with large classification error rate is given small weights. M means that the lifting tree has M weak classifiers.  $G_m(x)$  denotes the mth weak classifier, and  $\alpha_m$  is the parameter of the Mth weak classifier.  $w_{i,m}$  represents the weight of the i instance around m. The algorithmic principle of AdaBoost is as follow:

- (a) Entering training data  $D = \{(x_1, y_1), \dots, (x_m, y_m)\}$ , which  $x_m$  is feature vector,  $y_m$  is target vector, and m is the number of training data
- (b) Initialize the weight vector by the following equation:

$$w_1(x_i) = \frac{1}{m} \tag{S4}$$

- (c) Finding T weak learners  $h_t(t=1,2,\dots,T)$  and initialization  $t = 0$   
Determine  $P_t(x_i)$

$$P_t(x_i) = \frac{w_t(x_i)}{\sum_{i=1}^m w_t(x_i)} \quad S5$$

Calculate the error rate:

$$\varepsilon_t = \sum P_t(x_i)[h_t(x_i) - y_i] \quad S6$$

If  $\varepsilon_t > 0.5$  and  $T = t-1$  exit the loop

Calculate weight confidence  $\alpha_t$

$$\alpha_t = \log \frac{\varepsilon_t}{1 - \varepsilon_t} \quad S7$$

Modify the weight of all training data from  $i$  to  $m$ :

$$w_{t+1}(x_i) = w_t(x_i) \times e^{-y_i h_t(x_i) \alpha_t} \quad S8$$

If  $\varepsilon_t > 0.001$  and  $t < T$  return to A

$$w_{t+1}(x_i) = w_t(x_i) \times e^{-y_i h_t(x_i) \alpha_t} \quad S9$$

(d) The output is a strong learner that combines weak weight learners:

$$H(x) = \text{sign} \left[ \sum_t^T \alpha_t [h_t(x) = y] \right] \quad S10$$

### Note S7. The computational methods of $R^2$ score and RMSE

The prediction accuracy of ML models is evaluated with  $R^2$  score and RMSE, which are expressed as:

$$R^2 = 1 - \frac{\frac{1}{n} \sum_{i=1}^n (y_i - \hat{y}_i)^2}{\frac{1}{n} \sum_{i=1}^n (y_i - \bar{y})^2} \quad S11$$

$$RMSE = \sqrt{\frac{1}{n} \sum_{i=1}^n (y_i - \hat{y}_i)^2} \quad S12$$

where  $y_i$  indicates the ground truth and  $\hat{y}_i$  indicates the prediction of the model.  $R^2$  score ranges from 0 to 1, and the closer it is to 1, the better the prediction performance of the model is. RMSE represents the loss between the prediction and the ground truth. The loss is lower, the model performs better.

### Note S8. The computational methods of Leave-One-Out Cross-Validation (LOOCV)

LOOCV provides train/test indices to split data in train/test sets. Each sample is used once as a test set (singleton) while the remaining samples form the training set. LOOCV estimate of test error is averaged over the  $n$  models:

$$CV_n = \frac{1}{n} \sum_{i=1}^n (y_i - \hat{y}_i)^2 \quad S13$$



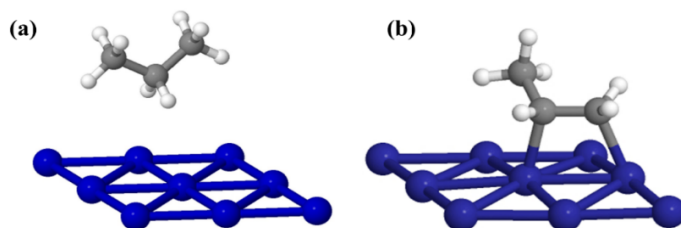

Figure S1. The adsorption configurations of (a) propane and (b) propene

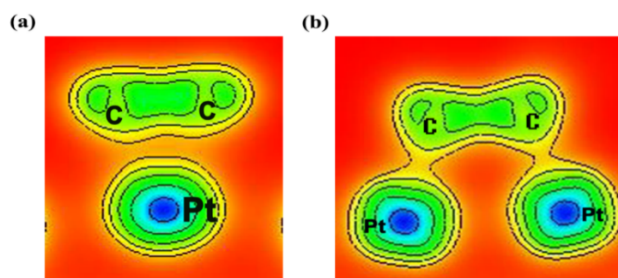

Figure S2. The ELF diagrams of (a) propane adsorption and (b) propene adsorption

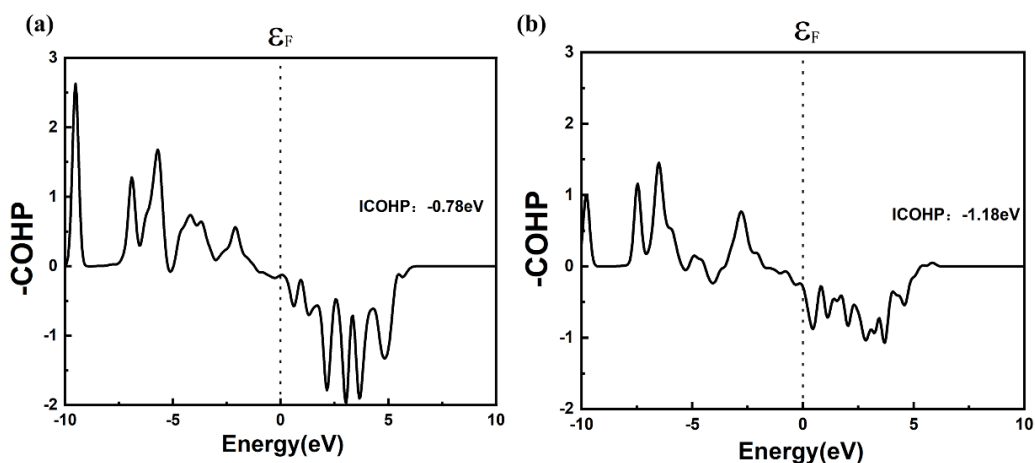

Figure S3. The COHP diagrams of (a) propane adsorption and (b) propene adsorption

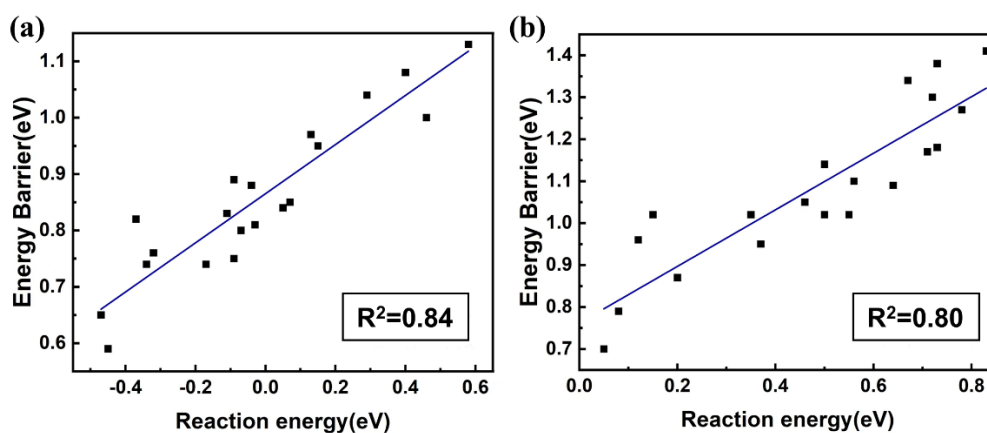

Figure S4. BEP relation of energy barriers and reaction energy of the C-H bond breaking of (a) propane (b) propene

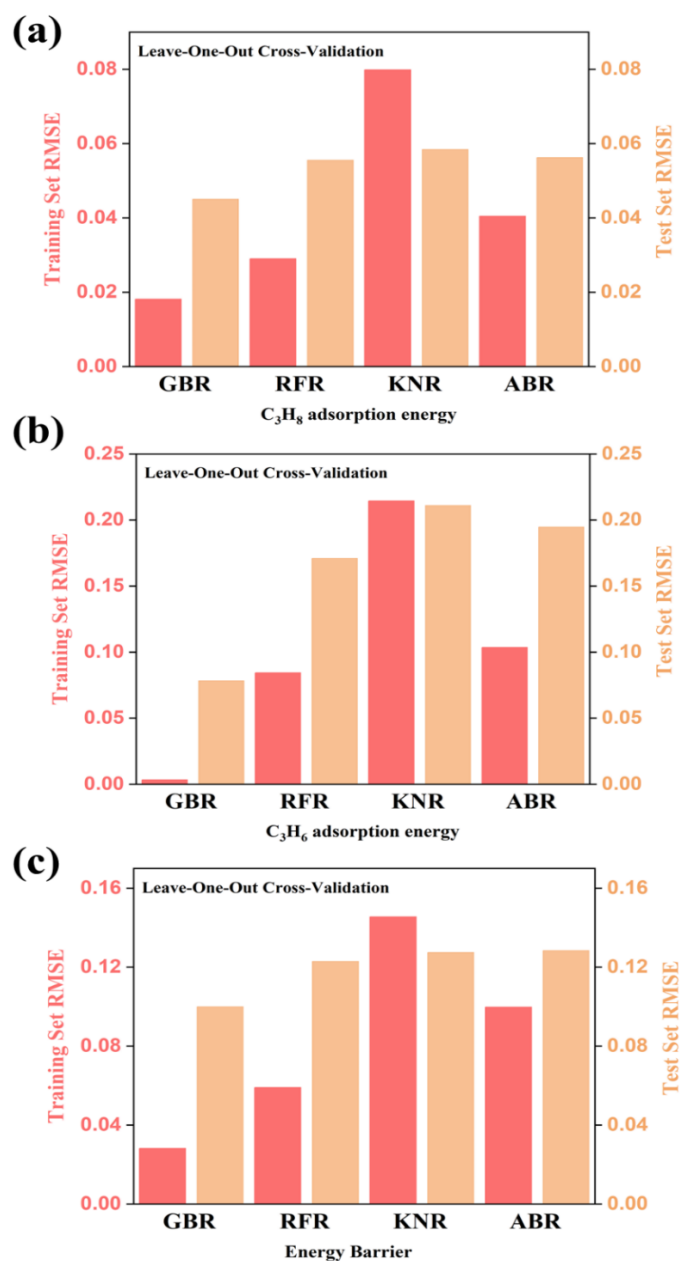

**Figure S5. Leave-One-Out Cross-Validation average RMSE of (a) Propane adsorption energy (b) Propene adsorption energy (c) Energy barrier of C-H bond breaking**

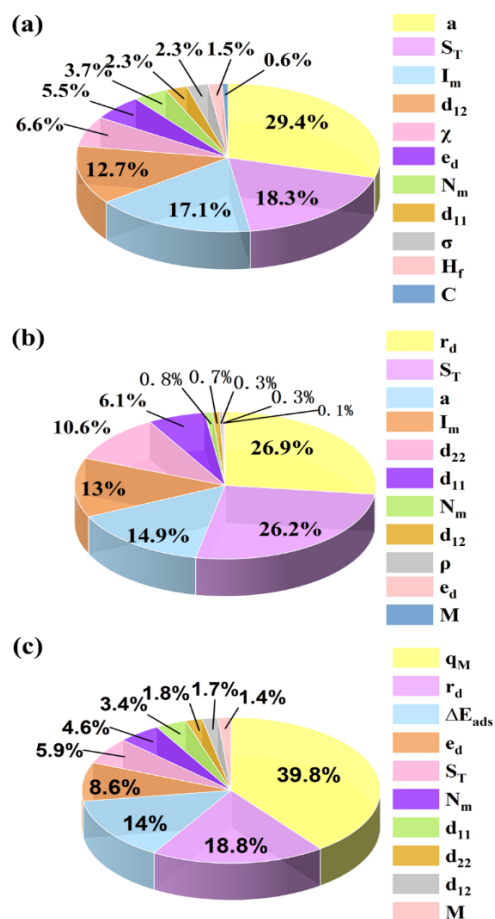

Figure S6. Feature importance of (a) Propane adsorption energy (b) Propene adsorption energy (c) Energy barrier of C-H bond breaking.

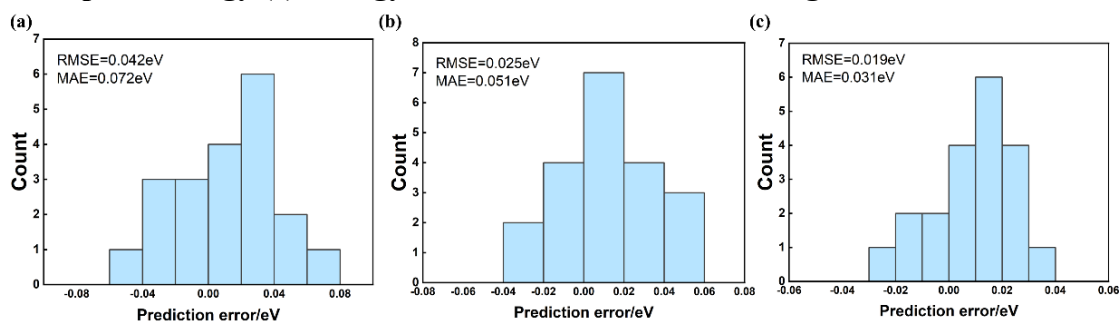

Figure S7. The error distributions for all the lower-dimensional models of  $E_{b8}$ : (a) 1D, (b) 2D, (c) 3D.

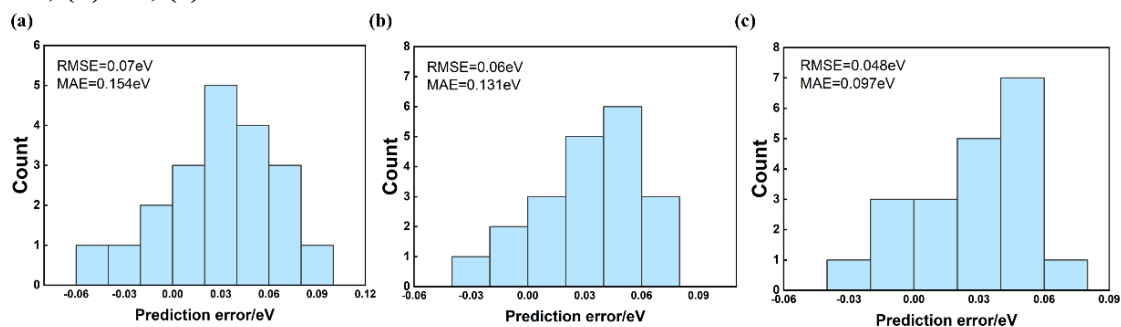

Figure S8. The error distributions for all the lower-dimensional models of  $E_{b6}$ : (a) 1D, (b) 2D, (c) 3D.

**Table S1. Summary of adsorption energy in literature and current work.**

|                       | Propane adsorption(eV) |                    | Propene adsorption(eV) |            |                    |
|-----------------------|------------------------|--------------------|------------------------|------------|--------------------|
|                       | Current work           | literature         | Current work           | literature |                    |
| Pt <sub>3</sub> Sn/Pt | -0.43                  | -0.34 <sup>1</sup> | Pt                     | -1.79      | -1.68 <sup>2</sup> |
| Pt <sub>3</sub> Sn/Pt | -0.43                  | -0.41 <sup>3</sup> | Pt                     | -1.79      | -1.41 <sup>4</sup> |
| Pt <sub>3</sub> Sn    | -0.36                  | -0.33 <sup>1</sup> | Pt <sub>3</sub> In     | -1.29      | -1.31 <sup>4</sup> |
| Pt <sub>3</sub> Sn    | -0.36                  | -0.38 <sup>3</sup> | PtRu                   | -1.00      | -0.95 <sup>4</sup> |
| Pt                    | -0.51                  | -0.35 <sup>2</sup> |                        |            |                    |
| Pt                    | -0.51                  | -0.46 <sup>4</sup> |                        |            |                    |
| Pt                    | -0.51                  | -0.42 <sup>3</sup> |                        |            |                    |
| PtRu                  | -0.51                  | -0.44 <sup>4</sup> |                        |            |                    |

**Table S2. Summary of energy barrier in literature and current work.**

|                    | Energy barriers for propane dehydrogenation(eV) |                   | Energy barriers for propylene deep dehydrogenation(eV) |            |                   |
|--------------------|-------------------------------------------------|-------------------|--------------------------------------------------------|------------|-------------------|
|                    | Current work                                    | literature        | Current work                                           | literature |                   |
| Pt <sub>3</sub> Sn | 0.85                                            | 0.78 <sup>3</sup> | Pt <sub>3</sub> Sn                                     | 1.05       | 1.11 <sup>3</sup> |
| Pt                 | 0.76                                            | 0.77 <sup>2</sup> | Pt                                                     | 1.02       | 1.08 <sup>2</sup> |
| Pt                 | 0.76                                            | 0.70 <sup>3</sup> | Pt                                                     | 1.02       | 0.77 <sup>3</sup> |
| PtNi               | 0.65                                            | 0.62 <sup>4</sup> | Pt <sub>3</sub> V                                      | 0.96       | 1.02 <sup>5</sup> |
| PtRu               | 0.59                                            | 0.63 <sup>4</sup> | Pt <sub>3</sub> Ga                                     | 1.09       | 1.3 <sup>5</sup>  |
|                    |                                                 |                   | Pt <sub>3</sub> In                                     | 0.87       | 0.86 <sup>5</sup> |

**Table S3. Summary of lattice constants in literature and current work.**

|                    | Current work | literature         |
|--------------------|--------------|--------------------|
| Pt                 | 3.97         | 4.04Å <sup>1</sup> |
| Pt                 | 3.97         | 3.93Å <sup>6</sup> |
| Pt                 | 3.97         | 3.98Å <sup>7</sup> |
| Pt <sub>3</sub> Sn | 4.02         | 4.10Å <sup>1</sup> |
| Pt <sub>3</sub> Sn | 4.02         | 4.00Å <sup>6</sup> |

**Table S4. Summary of applied method, descriptor, PtM model, predicted best candidate in literature and current work.**

| Ref 1 <sup>8</sup> |                                       |
|--------------------|---------------------------------------|
| Method             | Descriptor screening                  |
| Descriptor         | CH <sub>3</sub> and CH binding energy |

|                     |                                                                       |
|---------------------|-----------------------------------------------------------------------|
| PtM model           | First layer surface adding                                            |
| Best catalyst       | High coverage: Pt <sub>3</sub> Pb, Low coverage: PtSb                 |
| Ref 2 <sup>9</sup>  |                                                                       |
| Method              | Descriptor based microkinetic                                         |
| Descriptor          | CH <sub>3</sub> and CH binding energy                                 |
| PtM model           | Bulk adding                                                           |
| Best catalyst       | Pt <sub>3</sub> Ga                                                    |
| Ref 3 <sup>10</sup> |                                                                       |
| Method              | Descriptor based microkinetic                                         |
| Descriptor          | formation energy of CH <sub>3</sub> CH <sub>2</sub> * and CH*         |
| PtM model           | Bulk adding                                                           |
| Best catalyst       | NiMo                                                                  |
| Current work        |                                                                       |
| Method              | Machine learning                                                      |
| Descriptor          | C-H bond activation energy and propene adsorption                     |
| PtM model           | Bulk adding, first layer surface adding, and sub-layer surface adding |
| Best catalyst       | Pt <sub>3</sub> Mo                                                    |

**Table S5. Adsorption energy of propane and propylene on Pt-M obtained from DFT calculations.**

| Configuration of PtM(111) | Adsorption energy of propane(eV) | Adsorption energy of propylene (eV) |
|---------------------------|----------------------------------|-------------------------------------|
| Pt                        | -0.510                           | -1.790                              |
| Sn-firstlayer-3:1         | -0.432                           | -1.219                              |
| Sn-bulk-3:1               | -0.357                           | -1.022                              |
| Sn-secondlayer-1:1        | -0.557                           | -1.580                              |
| Zn-bulk-3:1               | -0.566                           | -1.062                              |
| Zn-bulk-1:1               | -0.473                           | -0.989                              |
| Zn-firstlayer-3:1         | -0.537                           | -1.584                              |
| Zn-secondlayer-3:1        | -0.596                           | -1.607                              |
| In-bulk-3:1               | -0.501                           | -1.287                              |
| In-secondlayer-3:1        | -0.595                           | -1.442                              |
| In-firstlayer-3:1         | -0.447                           | -1.139                              |
| In-secondlayer-1:1        | -0.597                           | -1.234                              |
| Ga-secondlayer-3:1        | -0.595                           | -1.844                              |
| Ga-firstlayer-1:1         | -0.678                           | -1.426                              |
| Ga-firstlayer-3:1         | -0.676                           | -1.697                              |
| Ga-secondlayer-1:1        | -0.628                           | -1.758                              |
| Cu-bulk-3:1               | -0.584                           | -1.533                              |
| Cu-firstlayer-3:1         | -0.568                           | -1.821                              |
| Cu-bulk-1:1               | -0.619                           | -1.493                              |

|                    |        |        |
|--------------------|--------|--------|
| Cu-secondlayer-3:1 | -0.648 | -1.672 |
| Cu-firstlayer-1:1  | -0.604 | -1.504 |
| Cu-secondlayer-1:1 | -0.602 | -1.571 |
| Ag-bulk-3:1        | -0.553 | -1.270 |
| Ag-firstlayer-3:1  | -0.567 | -1.253 |
| Ag-bulk-1:1        | -0.562 | -1.972 |
| Ge-bulk-3:1        | -0.465 | -1.734 |
| Ge-secondlayer-3:1 | -0.579 | -1.391 |
| Ni-bulk-3:1        | -0.731 | -1.992 |
| Ni-bulk-1:1        | -0.532 | -1.564 |
| Ni-firstlayer-3:1  | -0.713 | -2.316 |
| Ni-secondlayer-3:1 | -0.593 | -1.150 |
| Ni-secondlayer-1:1 | -0.597 | -1.677 |
| Co-bulk-1:1        | -0.495 | -1.610 |
| Co-firstlayer-3:1  | -0.535 | -1.377 |
| Co-secondlayer-3:1 | -0.594 | -0.189 |
| Co-firstlayer-1:1  | -0.502 | -1.623 |
| Co-secondlayer-1:1 | -0.575 | -1.622 |
| Fe-firstlayer-3:1  | -0.580 | -1.397 |
| Au-bulk-3:1        | -0.600 | -0.650 |
| Au-firstlayer-3:1  | -0.577 | -0.927 |
| Au-bulk-1:1        | -0.583 | -1.607 |
| Nb-bulk-3:1        | -0.497 | -0.887 |
| Nb-bulk-1:1        | -0.472 | -0.551 |
| Nb-firstlayer-3:1  | -0.531 | -1.589 |
| Nb-secondlayer-3:1 | -0.587 | -1.777 |
| Mo-bulk-1:1        | -0.476 | -1.422 |
| Mo-firstlayer-3:1  | -0.668 | -1.184 |
| Ru-firstlayer-3:1  | -0.539 | -1.531 |
| Ru-bulk-3:1        | -0.542 | -1.734 |
| Ru-bulk-1:1        | -0.511 | -1.009 |
| Ru-secondlayer-3-1 | -0.589 | -1.972 |
| Ti-firstlayer-3:1  | -0.656 | -1.471 |
| Ti-bulk-3:1        | -0.548 | -1.659 |
| Ti-bulk-1:1        | -0.739 | -1.576 |
| Ti-secondlayer-3:1 | -0.592 | -1.779 |
| Pd-bulk-3:1        | -0.589 | -1.587 |
| Pd-bulk-1:1        | -0.586 | -0.716 |
| Pd-firstlayer-3:1  | -0.597 | -0.909 |
| Cr-secondlayer-3:1 | -0.586 | -1.170 |
| Tl-firstlayer-3:1  | -0.389 | -1.058 |
| Hg-firstlayer-3:1  | -0.504 | -1.166 |
| Hg-bulk-3:1        | -0.520 | -0.973 |
| Cd-bulk-3:1        | -0.503 | -1.006 |

|                   |        |        |
|-------------------|--------|--------|
| Cd-bulk-1:1       | -0.448 | -1.234 |
| Cd-firstlayer-3:1 | -0.507 | -0.793 |
| Pb-bulk-3:1       | -0.442 | -0.579 |
| Pb-firstlayer-3:1 | -0.346 | -1.075 |
| V-bulk-3:1        | -0.514 | -1.336 |
| V-bulk-1:1        | -0.507 | -1.738 |
| V-secondlayer-3:1 | -0.594 | -1.512 |
| V-firstlayer-1:1  | -0.507 | -1.694 |
| V-secondlayer-1:1 | -0.633 | -1.216 |
| Tc-bulk-3:1       | -0.499 | -1.235 |
| Tc-firstlayer-3:1 | -0.514 | -1.683 |

**Table S6. The C-H bond activation energy barrier and reaction energy of Pt-M calculated from DFT calculation.**

| Promoter element | Propane to 2-propyl |                    | Propene to 2-propenyl |                    |
|------------------|---------------------|--------------------|-----------------------|--------------------|
|                  | Reaction Energy(eV) | Energy Barrier(eV) | Reaction Energy(eV)   | Energy Barrier(eV) |
| Ga               | -0.07               | 0.80               | 0.37                  | 0.95               |
| Co               | 0.46                | 1.00               | 0.50                  | 1.02               |
| V                | -0.04               | 0.88               | 0.12                  | 0.96               |
| Cu               | 0.05                | 0.84               | 0.83                  | 1.41               |
| Zn               | 0.40                | 1.08               | 0.56                  | 1.10               |
| Ag               | -0.11               | 0.83               | 0.50                  | 1.14               |
| Ru               | -0.03               | 0.81               | 0.08                  | 0.79               |
| Pd               | -0.09               | 0.75               | 0.35                  | 1.02               |
| Au               | -0.17               | 0.74               | 0.73                  | 1.18               |
| Sn               | 0.07                | 0.85               | 0.46                  | 1.05               |
| Nb               | 0.29                | 1.04               | 0.64                  | 1.09               |
| Tc               | 0.13                | 0.97               | 0.72                  | 1.30               |
| Sc               | -0.37               | 0.82               | 0.71                  | 1.17               |
| Ni               | -0.47               | 0.65               | 0.67                  | 1.34               |
| Ru               | -0.45               | 0.59               | 0.78                  | 1.27               |
| Ti               | -0.34               | 0.74               | 0.05                  | 0.70               |
| Rh               | 0.58                | 1.13               | 0.73                  | 1.38               |
| Hg               | 0.15                | 0.95               | 0.55                  | 1.22               |
| Pt               | -0.32               | 0.76               | 0.15                  | 1.02               |
| In               | -0.09               | 0.89               | 0.20                  | 0.87               |

**Table S7. The C-H bond activation energy barrier of propane and propylene on Pt-M obtained from BEP relations shown in Figure S4.**

| Configuration of PtM(111) | Energy barrier of Propane to 2-propyl(eV) | Energy barrier of Propene to 2 propenyl(eV) |
|---------------------------|-------------------------------------------|---------------------------------------------|
| Pt                        | 0.760                                     | 1.020                                       |
| Sn-firstlayer-3:1         | 0.852                                     | 1.386                                       |
| Sn-bulk-3:1               | 0.893                                     | 1.048                                       |
| Sn-firstlayer-1:1         | 0.997                                     | 1.332                                       |
| Sn-secondlayer-1:1        | 0.964                                     | 1.217                                       |
| Zn-bulk-3:1               | 0.965                                     | 1.234                                       |
| Zn-bulk-1:1               | 1.056                                     | 1.116                                       |
| Zn-firstlayer-3:1         | 0.713                                     | 1.115                                       |
| Zn-secondlayer-3:1        | 0.672                                     | 1.014                                       |
| In-bulk-3:1               | 0.919                                     | 1.257                                       |
| In-secondlayer-3:1        | 0.811                                     | 0.725                                       |
| In-firstlayer-3:1         | 0.916                                     | 0.868                                       |
| In-firstlayer-1:1         | 0.999                                     | 1.217                                       |
| In-secondlayer-1:1        | 1.065                                     | 1.075                                       |
| Ga-bulk-3:1               | 0.715                                     | 1.016                                       |
| Ga-secondlayer-3:1        | 0.830                                     | 0.741                                       |
| Ga-firstlayer-1:1         | 0.793                                     | 0.892                                       |
| Ga-firstlayer-3:1         | 0.753                                     | 1.158                                       |
| Ga-secondlayer-1:1        | 0.960                                     | 0.994                                       |
| Cu-bulk-3:1               | 0.879                                     | 1.307                                       |
| Cu-firstlayer-3:1         | 0.640                                     | 1.064                                       |
| Cu-bulk-1:1               | 0.863                                     | 1.080                                       |
| Cu-secondlayer-3:1        | 0.763                                     | 0.954                                       |
| Cu-firstlayer-1:1         | 0.637                                     | 1.115                                       |
| Cu-secondlayer-1:1        | 0.913                                     | 0.736                                       |
| Ag-bulk-3:1               | 0.802                                     | 1.204                                       |
| Ag-firstlayer-3:1         | 0.801                                     | 1.075                                       |
| Ag-bulk-1:1               | 0.954                                     | 1.192                                       |
| Ge-bulk-3:1               | 0.827                                     | 0.894                                       |
| Ge-secondlayer-3:1        | 0.611                                     | 0.786                                       |
| Ni-bulk-3:1               | 0.825                                     | 1.027                                       |
| Ni-bulk-1:1               | 0.854                                     | 0.988                                       |
| Ni-firstlayer-3:1         | 0.627                                     | 1.102                                       |
| Ni-secondlayer-3:1        | 0.760                                     | 0.871                                       |
| Ni-secondlayer-1:1        | 0.898                                     | 1.224                                       |
| Ni-firstlayer-1:1         | 0.891                                     | 1.241                                       |
| Co-bulk-1:1               | 1.084                                     | 1.075                                       |
| Co-firstlayer-3:1         | 0.645                                     | 0.770                                       |
| Co-secondlayer-3:1        | 0.790                                     | 1.015                                       |



|                    |        |        |
|--------------------|--------|--------|
| Co-firstlayer-1:1  | 0.634  | 1.222  |
| Co-secondlayer-1:1 | 0.957  | 1.064  |
| Fe-firstlayer-3:1  | 0.628  | 1.056  |
| Au-bulk-3:1        | 0.791  | 0.831  |
| Au-firstlayer-3:1  | 0.773  | 1.134  |
| Au-bulk-1:1        | 0.884  | 1.237  |
| Nb-bulk-3:1        | 1.098  | 0.852  |
| Nb-bulk-1:1        | 0.954  | 0.488  |
| Nb-firstlayer-3:1  | 0.674  | 1.174  |
| Nb-secondlayer-3:1 | 1.001  | 1.231  |
| Mo-bulk-1:1        | 0.754  | 1.199  |
| Mo-bulk-3:1        | 0.933  | 0.590  |
| Ru-firstlayer-3:1  | 0.741  | 0.736  |
| Ru-bulk-3:1        | 0.828  | 0.787  |
| Ru-bulk-1:1        | 0.928  | 1.266  |
| Ru-secondlayer-3-1 | 0.841  | 0.850  |
| Ti-firstlayer-3:1  | 0.690  | 1.125  |
| Ti-bulk-3:1        | 0.944  | 1.457  |
| Ti-bulk-1:1        | 0.659  | 0.946  |
| Ti-secondlayer-3:1 | 0.852  | 1.176  |
| Pd-bulk-3:1        | 0.790  | 0.922  |
| Pd-bulk-1:1        | 0.810  | 0.975  |
| Pd-firstlayer-3:1  | 0.757  | 0.900  |
| Cr-secondlayer-3:1 | 0.794  | 1.058  |
| Cd-bulk-3:1        | 0.863  | 1.199  |
| Pb-firstlayer-3:1  | 0.837  | 1.243  |
| V-bulk-3:1         | 0.981  | 1.316  |
| V-bulk-1:1         | 0.753  | 0.876  |
| V-firstlayer-3:1   | 0.693  | 1.215  |
| V-secondlayer-3:1  | 0.836  | 1.117  |
| V-firstlayer-1:1   | 0.553  | 1.008  |
| V-secondlayer-1:1  | 0.693  | 1.265  |
| Tc-bulk-3:1        | 0.920  | 0.794  |
| Tc-bulk-1:1        | 1.036  | 1.116  |
| Tc-firstlayer-3:1  | 0.689  | 0.853  |
| Tc-bulk-3:1        | -0.499 | -1.235 |
| Tc-firstlayer-3:1  | -0.514 | -1.683 |

---

**Table S8. The tabulated data shown in Figure 2.**

| Vertical axis<br>Pt-M configuration<br>corresponding to<br>each bar from the<br>bottom up | Horizontal axis ( $E_{Pt-M}$ minus $E_{Pt}$ ) |                                                        |                                 |                                                        |
|-------------------------------------------------------------------------------------------|-----------------------------------------------|--------------------------------------------------------|---------------------------------|--------------------------------------------------------|
|                                                                                           | Propane<br>adsorption<br>energy               | C-H bond<br>activation<br>energy barrier<br>of propane | Propene<br>adsorption<br>energy | C-H bond<br>activation<br>energy barrier<br>of propene |
| Sn-firstlayer-3:1                                                                         | 0.078                                         | 0.571                                                  | 0.092                           | 0.366                                                  |
| Sn-bulk-3:1                                                                               | 0.153                                         | 0.768                                                  | 0.133                           | 0.028                                                  |
| Sn-secondlayer-1:1                                                                        | -0.047                                        | 0.21                                                   | 0.237                           | 0.312                                                  |
| Zn-bulk-3:1                                                                               | -0.056                                        | 0.728                                                  | 0.204                           | 0.197                                                  |
| Zn-bulk-1:1                                                                               | 0.037                                         | 0.801                                                  | 0.205                           | 0.214                                                  |
| Zn-firstlayer-3:1                                                                         | -0.027                                        | 0.206                                                  | 0.296                           | 0.096                                                  |
| Zn-secondlayer-3:1                                                                        | -0.086                                        | 0.183                                                  | -0.047                          | 0.095                                                  |
| In-bulk-3:1                                                                               | 0.009                                         | 0.503                                                  | -0.088                          | -0.006                                                 |
| In-secondlayer-3:1                                                                        | -0.085                                        | 0.348                                                  | 0.159                           | 0.237                                                  |
| In-firstlayer-3:1                                                                         | 0.063                                         | 0.651                                                  | 0.051                           | -0.295                                                 |
| In-secondlayer-1:1                                                                        | -0.087                                        | 0.556                                                  | 0.156                           | -0.152                                                 |
| Ga-secondlayer-3:1                                                                        | -0.085                                        | -0.054                                                 | 0.239                           | 0.197                                                  |
| Ga-firstlayer-1:1                                                                         | -0.168                                        | 0.364                                                  | 0.305                           | 0.055                                                  |
| Ga-firstlayer-3:1                                                                         | -0.166                                        | 0.093                                                  | -0.045                          | -0.004                                                 |
| Ga-secondlayer-1:1                                                                        | -0.118                                        | 0.032                                                  | 0.07                            | -0.279                                                 |
| Cu-bulk-3:1                                                                               | -0.074                                        | 0.257                                                  | 0.033                           | -0.128                                                 |
| Cu-firstlayer-3:1                                                                         | -0.058                                        | -0.031                                                 | -0.007                          | 0.138                                                  |
| Cu-bulk-1:1                                                                               | -0.109                                        | 0.297                                                  | 0.2                             | -0.026                                                 |
| Cu-secondlayer-3:1                                                                        | -0.138                                        | 0.118                                                  | 0.119                           | 0.287                                                  |
| Cu-firstlayer-1:1                                                                         | -0.094                                        | 0.286                                                  | -0.12                           | 0.044                                                  |
| Cu-secondlayer-1:1                                                                        | -0.092                                        | 0.219                                                  | 0.103                           | 0.06                                                   |
| Ag-bulk-3:1                                                                               | -0.043                                        | 0.52                                                   | 0.003                           | -0.066                                                 |
| Ag-firstlayer-3:1                                                                         | -0.057                                        | 0.537                                                  | -0.123                          | 0.095                                                  |
| Ag-bulk-1:1                                                                               | -0.052                                        | -0.182                                                 | 0.153                           | -0.284                                                 |
| Ge-bulk-3:1                                                                               | 0.045                                         | 0.056                                                  | 0.042                           | 0.184                                                  |
| Ge-secondlayer-3:1                                                                        | -0.069                                        | 0.399                                                  | 0.041                           | 0.055                                                  |
| Ni-bulk-3:1                                                                               | -0.221                                        | -0.202                                                 | 0.194                           | 0.172                                                  |
| Ni-bulk-1:1                                                                               | -0.022                                        | 0.226                                                  | 0.067                           | -0.126                                                 |
| Ni-firstlayer-3:1                                                                         | -0.203                                        | -0.526                                                 | -0.149                          | -0.234                                                 |
| Ni-secondlayer-3:1                                                                        | -0.083                                        | 0.64                                                   | 0.065                           | 0.007                                                  |
| Ni-secondlayer-1:1                                                                        | -0.087                                        | 0.113                                                  | 0.094                           | -0.032                                                 |
| Co-bulk-1:1                                                                               | 0.015                                         | 0.18                                                   | -0.133                          | 0.082                                                  |
| Co-firstlayer-3:1                                                                         | -0.025                                        | 0.413                                                  | 0                               | -0.149                                                 |
| Co-secondlayer-3:1                                                                        | -0.084                                        | 1.601                                                  | 0.138                           | 0.204                                                  |
| Co-firstlayer-1:1                                                                         | 0.008                                         | 0.167                                                  | 0.131                           | 0.221                                                  |
| Co-secondlayer-1:1                                                                        | -0.065                                        | 0.168                                                  | 0.324                           | 0.055                                                  |
| Fe-firstlayer-3:1                                                                         | -0.07                                         | 0.393                                                  | -0.115                          | -0.25                                                  |
| Au-bulk-3:1                                                                               | -0.09                                         | 1.14                                                   | 0.03                            | -0.005                                                 |

|                    |        |        |        |        |
|--------------------|--------|--------|--------|--------|
| Au-firstlayer-3:1  | -0.067 | 0.863  | -0.126 | 0.202  |
| Au-bulk-1:1        | -0.073 | 0.183  | 0.197  | 0.044  |
| Nb-bulk-3:1        | 0.013  | 0.903  | -0.132 | 0.036  |
| Nb-bulk-1:1        | 0.038  | 1.239  | 0.031  | -0.189 |
| Nb-firstlayer-3:1  | -0.021 | 0.201  | 0.013  | 0.114  |
| Nb-secondlayer-3:1 | -0.077 | 0.013  | 0.124  | 0.217  |
| Mo-bulk-1:1        | 0.034  | 0.368  | 0.338  | -0.168 |
| Mo-firstlayer-3:1  | -0.158 | 0.606  | 0.194  | -0.532 |
| Ru-firstlayer-3:1  | -0.029 | 0.259  | -0.086 | 0.154  |
| Ru-bulk-3:1        | -0.032 | 0.056  | 0.241  | 0.211  |
| Ru-bulk-1:1        | -0.001 | 0.781  | -0.006 | 0.179  |
| Ru-secondlayer-3-1 | -0.079 | -0.182 | 0.173  | -0.43  |
| Ti-firstlayer-3:1  | -0.146 | 0.319  | -0.019 | -0.284 |
| Ti-bulk-3:1        | -0.038 | 0.131  | 0.068  | -0.233 |
| Ti-bulk-1:1        | -0.229 | 0.214  | 0.168  | 0.246  |
| Ti-secondlayer-3:1 | -0.082 | 0.011  | 0.081  | -0.17  |
| Pd-bulk-3:1        | -0.079 | 0.203  | -0.07  | 0.105  |
| Pd-bulk-1:1        | -0.076 | 1.074  | 0.184  | 0.437  |
| Pd-firstlayer-3:1  | -0.087 | 0.881  | 0.09   | -0.074 |
| Cr-secondlayer-3:1 | -0.076 | 0.62   | 0.101  | 0.156  |
| Tl-firstlayer-3:1  | 0.121  | 0.732  | 0.092  | -0.098 |
| Hg-firstlayer-3:1  | 0.006  | 0.624  | 0.03   | -0.045 |
| Hg-bulk-3:1        | -0.01  | 0.817  | -0.069 | -0.12  |
| Cd-bulk-3:1        | 0.007  | 0.784  | 0.05   | 0.038  |
| Cd-bulk-1:1        | 0.062  | 0.556  | -0.075 | 0.179  |
| Cd-firstlayer-3:1  | 0.003  | 0.997  | 0.034  | 0.223  |
| Pb-bulk-3:1        | 0.068  | 1.211  | 0.103  | 0.212  |
| Pb-firstlayer-3:1  | 0.164  | 0.715  | 0.077  | 0.296  |
| V-bulk-3:1         | -0.004 | 0.454  | 0.221  | -0.144 |
| V-bulk-1:1         | 0.003  | 0.052  | -0.007 | 0.195  |
| V-secondlayer-3:1  | -0.084 | 0.278  | -0.067 | 0.097  |
| V-firstlayer-1:1   | 0.003  | 0.096  | 0.067  | -0.012 |
| V-secondlayer-1:1  | -0.123 | 0.574  | 0.16   | 0.245  |
| Tc-bulk-3:1        | 0.011  | 0.555  | 0.276  | -0.226 |
| Tc-firstlayer-3:1  | -0.004 | 0.107  | -0.071 | -0.167 |

**Table S9. List of features for ML method**

|                   |                                |       |
|-------------------|--------------------------------|-------|
| Atomic structures | group numbers                  | G     |
|                   | period numbers                 | P     |
|                   | relative atomic mass           | M     |
|                   | atomic radius                  | $r_d$ |
|                   | lattice parameter              | a     |
| Physical          | the standard heat of formation | $H_f$ |

|                                     |                                                                      |            |
|-------------------------------------|----------------------------------------------------------------------|------------|
| properties                          | the standard molar entropy                                           | $S^\circ$  |
|                                     | density                                                              | $\rho$     |
|                                     | specific heat capacity                                               | $C$        |
|                                     | melting point                                                        | $M_p$      |
|                                     | electrical conductance                                               | $\sigma$   |
| Description of electronic structure | electron affinity                                                    | $\chi$     |
|                                     | d electron count                                                     | $e_d$      |
|                                     | Pauli electronegativity                                              | $N_m$      |
|                                     | the first ionization energy                                          | $I_m$      |
| Representation of alloy surface     | second metal doping method                                           | $S_T$      |
|                                     | bond length between metal atom and the nearest metal of monolayer    | $d_{11}$   |
|                                     | bond length between metal atom and the nearest metal of second layer | $d_{22}$   |
|                                     | bond length of the layer spacing between the first and second layers | $d_{12}$   |
|                                     | Energy of optimized Pt/M(111)                                        | $\Delta E$ |
|                                     | Bader charge transfer of Pt atoms and C atoms                        | $q_M$      |

**Table S10. parameters of ML model**

| Method | Parameter                                                      |
|--------|----------------------------------------------------------------|
| GBR    | Number of estimators: 400                                      |
|        | max depth: 6                                                   |
|        | learning rate: 0.06                                            |
|        | loss function: Huber.                                          |
| KNR    | Number of neighbors: 5                                         |
|        | weights function: uniform                                      |
|        | distance metric: minkowski;                                    |
|        | Leaf size: 30                                                  |
| RFR    | Number of estimators: 900                                      |
|        | criterion: mse                                                 |
|        | mtry:7                                                         |
| ABR    | Number of estimators: 800                                      |
|        | Learning rate: 0.1                                             |
| SISSO  | desc-dim: 5                                                    |
|        | subs-sis: 50                                                   |
|        | dimclass: (1:6)(7:9)(10:11)(12:12)(13:13)                      |
|        | opset:(+)(-)(*)(/)(exp)(exp-)(^1)(^2)(^3)(sqrt)(cbrt)(log)( -) |

**Table S11. Atomic parameters as inputs in the ML model**

| Element | $S^\circ$ | $\chi$ | ed    | Nm       | Im     |
|---------|-----------|--------|-------|----------|--------|
| Ru      | 186.5     | 1.05   | 7     | 2.2      | 7.5    |
| Hg      | 175       | 0      | 10    | 1.9      | 10.39  |
| Nb      | 186.3     | 0.892  | 4     | 1.41     | 6.77   |
| Ni      | 182.2     | 1.16   | 8     | 1.91     | 7.61   |
| Cu      | 166.4     | 1.227  | 10    | 1.9      | 7.69   |
| Mo      | 182       | 0.745  | 5     | 1.47     | 7.35   |
| Ti      | 180.3     | 0.079  | 2     | 1.38     | 6.81   |
| Pb      | 175.4     | 0.364  | 10    | 1.8      | 7.38   |
| Ge      | 167.9     | 1.23   | 10    | 2.01     | 7.85   |
| Co      | 179.5     | 0.66   | 7     | 1.88     | 7.81   |
| Au      | 180.5     | 2.309  | 10    | 2.54     | 9.19   |
| Cd      | 167.7     | 0      | 10    | 1.69     | 8.95   |
| Fe      | 180.5     | 0.163  | 6     | 1.83     | 7.83   |
| Sn      | 168.5     | 1.112  | 10    | 1.96     | 7.37   |
| Tc      | 181.1     | 0.55   | 5     | 1.9      | 7.28   |
| Pd      | 167.1     | 0.557  | 8     | 1.58     | 8.3    |
| V       | 182.3     | 0.524  | 3     | 1.63     | 6.76   |
| Ag      | 173       | 1.302  | 10    | 1.93     | 7.54   |
| Zn      | 161       | 0      | 10    | 1.65     | 9.35   |
| Cr      | 174.5     | 0.666  | 5     | 1.66     | 6.74   |
| rd      | M         | $\rho$ | C     | $\sigma$ | a      |
| 134     | 101.07    | 12.41  | 238   | 1.4      | 2.706  |
| 151     | 200.59    | 13.55  | 139.5 | 0.1      | 3.464  |
| 146     | 92.906    | 8.58   | 265   | 0.67     | 3.301  |
| 124     | 58.6934   | 8.902  | 445   | 1.4      | 3.524  |
| 128     | 63.546    | 8.92   | 384.3 | 5.9      | 3.615  |
| 139     | 95.94     | 10.22  | 251   | 2        | 3.147  |
| 147     | 47.867    | 4.54   | 520   | 0.25     | 2.951  |
| 175     | 207.2     | 11.34  | 127   | 0.48     | 4.95   |
| 125     | 58.9331   | 8.9    | 421   | 1.7      | 2.505  |
| 144     | 196.966   | 19.3   | 129.1 | 4.5      | 4.0781 |
| 154     | 112.411   | 8.64   | 240   | 1.4      | 2.979  |
| 126     | 55.845    | 7.88   | 449   | 1        | 2.866  |
| 162     | 118.71    | 7.29   | 217   | 0.91     | 5.831  |
| 136     | 98.906    | 11.49  | 63    | 0.5      | 2.737  |
| 137     | 106.42    | 12.02  | 240   | 1        | 3.89   |
| 134     | 50.9415   | 6.11   | 24.9  | 0.5      | 3.024  |
| 144     | 107.868   | 10.49  | 235   | 6.2      | 4.086  |
| 138     | 65.409    | 7.133  | 388   | 1.7      | 2.6648 |
| 171     | 204.383   | 11.85  | 129   | 0.67     | 3.456  |

**Table S12. The adsorption energy and C-H bond activation energy barrier of C<sub>3</sub>H<sub>8</sub> and C<sub>3</sub>H<sub>6</sub> on Pt-M(111) from ML prediction**

| Surface            | C <sub>3</sub> H <sub>8</sub> | C <sub>3</sub> H <sub>6</sub> | Propane to 2-propyl | Propylene to 2-propenyl |
|--------------------|-------------------------------|-------------------------------|---------------------|-------------------------|
| Ag-bulk-1:1        | -0.562                        | -1.270                        | 0.954               | 1.192                   |
| Ag-bulk-3:1        | -0.553                        | -1.504                        | 0.802               | 1.204                   |
| Ag-firstlayer-1:1  | -0.531                        | -1.629                        | 0.717               | 0.985                   |
| Ag-firstlayer-3:1  | -0.567                        | -1.571                        | 0.801               | 1.075                   |
| Ag-secondlayer-1:1 | -0.587                        | -1.275                        | 0.890               | 1.007                   |
| Ag-secondlayer-3:1 | -0.612                        | -1.463                        | 0.773               | 0.876                   |
| Au-bulk-1:1        | -0.583                        | -1.397                        | 0.884               | 1.237                   |
| Au-bulk-3:1        | -0.600                        | -1.623                        | 0.791               | 0.831                   |
| Au-first-1:1       | -0.513                        | -1.695                        | 0.794               | 1.038                   |
| Au-first-3:1       | -0.577                        | -1.622                        | 0.773               | 1.134                   |
| Au-second-1:1      | -0.576                        | -1.269                        | 0.883               | 1.058                   |
| Au-second-3:1      | -0.605                        | -1.532                        | 0.852               | 0.914                   |
| Cd-bulk-1:1        | -0.448                        | -1.006                        | 0.984               | 1.137                   |
| Cd-bulk-3:1        | -0.503                        | -0.973                        | 0.950               | 1.199                   |
| Cd-first-1:1       | -0.479                        | -1.409                        | 0.945               | 1.202                   |
| Cd-first-3:1       | -0.507                        | -1.234                        | 0.997               | 1.176                   |
| Cd-second-1:1      | -0.579                        | -1.360                        | 1.026               | 1.256                   |
| Cd-second-3:1      | -0.583                        | -1.488                        | 0.972               | 1.111                   |
| Co-bulk-1:1        | -0.495                        | -1.150                        | 1.084               | 1.075                   |
| Co-bulk-3:1        | -0.567                        | -1.391                        | 0.973               | 0.889                   |
| Co-first-1:1       | -0.502                        | -2.052                        | 0.634               | 0.897                   |
| Co-first-3:1       | -0.535                        | -1.677                        | 0.645               | 0.770                   |
| Co-second-1:1      | -0.575                        | -1.377                        | 0.957               | 0.948                   |
| Co-second-3:1      | -0.594                        | -1.610                        | 0.790               | 1.015                   |
| Cr-bulk-1:1        | -0.527                        | -1.390                        | 0.986               | 0.972                   |
| Cr-bulk-3:1        | -0.550                        | -1.406                        | 0.941               | 0.978                   |
| Cr-first-1:1       | -0.505                        | -1.897                        | 0.643               | 0.861                   |
| Cr-first-3:1       | -0.523                        | -1.729                        | 0.652               | 0.985                   |
| Cr-second-1:1      | -0.600                        | -1.275                        | 0.864               | 0.926                   |
| Cr-second-3:1      | -0.586                        | -1.587                        | 0.794               | 1.058                   |
| Cu-bulk-1:1        | -0.619                        | -1.493                        | 0.863               | 1.080                   |
| Cu-bulk-3:1        | -0.584                        | -1.533                        | 0.879               | 1.307                   |
| Cu-first-1:1       | -0.604                        | -2.039                        | 0.637               | 0.959                   |
| Cu-second-1:1      | -0.602                        | -1.440                        | 0.640               | 0.983                   |
| Cu-second-3:1      | -0.648                        | -1.672                        | 0.913               | 0.954                   |
| Fe-bulk-1:1        | -0.540                        | -1.047                        | 0.763               | 1.064                   |
| Fe-bulk-3:1        | -0.605                        | -0.978                        | 1.000               | 0.995                   |
| Fe-first-1:1       | -0.495                        | -0.598                        | 0.909               | 0.877                   |
| Fe-first-3:1       | -0.580                        | -0.189                        | 0.655               | 1.056                   |

|               |        |        |       |       |
|---------------|--------|--------|-------|-------|
| Fe-second-1:1 | -0.584 | -0.755 | 0.628 | 0.931 |
| Fe-second-3:1 | -0.592 | -0.395 | 0.863 | 0.827 |
| Hf-bulk-1:1   | -0.497 | -1.095 | 0.611 | 0.737 |
| Hf-bulk-3:1   | -0.509 | -1.052 | 0.857 | 1.102 |
| Hf-first-1:1  | -0.490 | -1.216 | 0.903 | 0.962 |
| Hf-first-3:1  | -0.528 | -0.953 | 0.795 | 0.981 |
| Hf-second-1:1 | -0.620 | -1.274 | 0.692 | 1.026 |
| Hf-second-3:1 | -0.590 | -1.283 | 0.929 | 0.917 |
| Hg-bulk-3:1   | -0.520 | -1.058 | 0.767 | 1.241 |
| Hg-first-1:1  | -0.503 | -1.389 | 0.865 | 1.189 |
| Hg-first-3:1  | -0.504 | -1.170 | 0.943 | 1.224 |
| Hg-second-1:1 | -0.585 | -1.348 | 0.931 | 1.214 |
| Hg-second-3:1 | -0.588 | -1.445 | 1.043 | 1.162 |
| Ir-bulk-1:1   | -0.509 | -1.145 | 0.811 | 0.998 |
| Ir-bulk-3:1   | -0.534 | -1.186 | 0.835 | 0.916 |
| Ir-first-1:1  | -0.522 | -1.843 | 0.782 | 1.067 |
| Ir-first-3:1  | -0.546 | -1.681 | 0.769 | 0.806 |
| Ir-second-1:1 | -0.594 | -1.268 | 0.593 | 1.072 |
| Ir-second-3:1 | -0.606 | -1.560 | 0.921 | 0.890 |
| Mn-bulk-1:1   | -0.542 | -0.886 | 0.789 | 1.239 |
| Mn-bulk-3:1   | -0.532 | -0.939 | 0.875 | 1.253 |
| Mn-first-1:1  | -0.516 | -1.551 | 0.799 | 1.059 |
| Mn-first-3:1  | -0.513 | -1.483 | 0.701 | 1.272 |
| Mn-second-1:1 | -0.583 | -1.132 | 0.719 | 1.062 |
| Mn-second-3:1 | -0.557 | -1.259 | 0.819 | 1.084 |
| Mo-bulk-1:1   | -0.476 | -0.551 | 0.722 | 0.590 |
| Mo-bulk-3:1   | -0.548 | -0.887 | 0.933 | 0.851 |
| Mo-first-1:1  | -0.573 | -1.672 | 0.844 | 0.835 |
| Mo-first-3:1  | -0.668 | -1.589 | 0.684 | 1.115 |
| Mo-second-1:1 | -0.643 | -1.297 | 0.636 | 0.898 |
| Mo-second-3:1 | -0.662 | -1.442 | 0.873 | 0.887 |
| Nb-bulk-1:1   | -0.472 | -0.927 | 0.716 | 0.488 |
| Nb-bulk-3:1   | -0.497 | -0.650 | 0.954 | 0.852 |
| Nb-first-1:1  | -0.512 | -1.681 | 1.098 | 0.915 |
| Nb-first-3:1  | -0.531 | -1.607 | 0.745 | 1.174 |
| Nb-second-1:1 | -0.630 | -1.288 | 0.674 | 0.975 |
| Nb-second-3:1 | -0.587 | -1.442 | 0.879 | 0.966 |
| Ni-bulk-1:1   | -0.532 | -1.391 | 1.001 | 0.988 |
| Ni-bulk-3:1   | -0.731 | -1.734 | 0.854 | 1.027 |
| Ni-first-1:1  | -0.543 | -2.316 | 0.825 | 0.960 |
| Ni-first-3:1  | -0.713 | -1.992 | 0.675 | 1.102 |
| Ni-second-1:1 | -0.597 | -1.527 | 0.627 | 1.010 |
| Ni-second-3:1 | -0.593 | -1.564 | 0.898 | 0.871 |
| Os-bulk-1:1   | -0.502 | -1.185 | 0.760 | 0.989 |

|               |        |        |       |       |
|---------------|--------|--------|-------|-------|
| Os-bulk-3:1   | -0.536 | -1.199 | 0.961 | 0.863 |
| Os-first-1:1  | -0.504 | -1.846 | 0.881 | 1.028 |
| Os-first-3:1  | -0.536 | -1.716 | 0.818 | 0.857 |
| Os-second-1:1 | -0.605 | -1.271 | 0.625 | 1.036 |
| Os-second-3:1 | -0.590 | -1.560 | 0.917 | 0.853 |
| Pb-bulk-3:1   | -0.442 | -0.793 | 0.837 | 1.320 |
| Pb-first-1:1  | -0.448 | -1.040 | 0.848 | 1.148 |
| Pb-first-3:1  | -0.346 | -0.579 | 0.968 | 1.243 |
| Pb-second-1:1 | -0.526 | -1.147 | 0.966 | 1.148 |
| Pb-second-3:1 | -0.493 | -1.061 | 1.015 | 0.933 |
| Pd-bulk-1:1   | -0.586 | -1.576 | 0.934 | 0.975 |
| Pd-bulk-3:1   | -0.589 | -1.659 | 0.810 | 1.153 |
| Pd-first-1:1  | -0.520 | -1.842 | 0.848 | 0.815 |
| Pd-first-3:1  | -0.597 | -1.779 | 0.656 | 0.900 |
| Pd-second-1:1 | -0.600 | -1.207 | 0.651 | 0.873 |
| Pd-second-3:1 | -0.610 | -1.557 | 0.854 | 0.908 |
| Re-bulk-1:1   | -0.496 | -1.042 | 0.711 | 0.818 |
| Re-bulk-3:1   | -0.513 | -1.029 | 0.982 | 0.765 |
| Re-first-1:1  | -0.514 | -1.486 | 0.893 | 0.906 |
| Re-first-3:1  | -0.527 | -1.437 | 0.746 | 0.868 |
| Re-second-1:1 | -0.609 | -1.026 | 0.607 | 0.914 |
| Re-second-3:1 | -0.601 | -1.407 | 0.877 | 0.777 |
| Rh-bulk-1:1   | -0.514 | -1.349 | 0.762 | 1.267 |
| Rh-bulk-3:1   | -0.539 | -1.463 | 0.960 | 1.268 |
| Rh-first-1:1  | -0.534 | -1.830 | 0.877 | 1.085 |
| Rh-first-3:1  | -0.552 | -1.752 | 0.736 | 1.070 |
| Rh-second-1:1 | -0.590 | -1.316 | 0.764 | 1.121 |
| Rh-second-3:1 | -0.607 | -1.532 | 0.860 | 0.999 |
| Ru-bulk-1:1   | -0.511 | -1.184 | 0.868 | 1.266 |
| Ru-bulk-3:1   | -0.542 | -1.422 | 0.928 | 0.787 |
| Ru-first-1:1  | -0.544 | -1.837 | 0.828 | 0.878 |
| Ru-first-3:1  | -0.539 | -1.777 | 0.711 | 0.736 |
| Ru-second-1:1 | -0.603 | -1.323 | 0.600 | 0.914 |
| Ru-second-3:1 | -0.589 | -1.531 | 0.862 | 0.850 |
| Sc-bulk-1:1   | -0.579 | -1.360 | 0.841 | 0.899 |
| Sc-bulk-3:1   | -0.548 | -0.909 | 0.880 | 1.229 |
| Sc-first-1:1  | -0.486 | -1.286 | 0.912 | 0.976 |
| Sc-first-3:1  | -0.539 | -1.210 | 0.823 | 1.040 |
| Sc-second-1:1 | -0.608 | -1.291 | 0.729 | 1.039 |
| Sc-second-3:1 | -0.576 | -1.307 | 0.913 | 0.908 |
| Sn-bulk-3:1   | -0.564 | -1.022 | 0.802 | 1.048 |
| Sn-first-1:1  | -0.520 | -0.892 | 0.893 | 1.332 |
| Sn-first-3:1  | -0.432 | -1.219 | 0.997 | 1.386 |
| Sn-second-1:1 | -0.557 | -1.580 | 0.852 | 1.217 |



|               |        |        |       |       |
|---------------|--------|--------|-------|-------|
| Sn-second-3:1 | -0.566 | -1.208 | 0.964 | 0.941 |
| Ta-bulk-1:1   | -0.497 | -1.176 | 0.916 | 0.803 |
| Ta-bulk-3:1   | -0.526 | -1.141 | 0.908 | 1.129 |
| Ta-first-1:1  | -0.500 | -1.595 | 0.935 | 0.938 |
| Ta-first-3:1  | -0.535 | -1.585 | 0.836 | 0.962 |
| Ta-second-1:1 | -0.620 | -1.188 | 0.684 | 0.997 |
| Ta-second-3:1 | -0.589 | -1.528 | 0.913 | 0.905 |
| Tc-bulk-1:1   | -0.478 | -1.351 | 0.794 | 0.794 |
| Tc-bulk-3:1   | -0.499 | -1.235 | 1.036 | 0.903 |
| Tc-first-1:1  | -0.529 | -1.827 | 0.920 | 0.853 |
| Tc-first-3:1  | -0.514 | -1.683 | 0.682 | 0.848 |
| Tc-second-1:1 | -0.609 | -1.289 | 0.689 | 0.941 |
| Tc-second-3:1 | -0.602 | -1.529 | 0.862 | 0.809 |
| Ti-bulk-1:1   | -0.739 | -1.972 | 0.727 | 0.946 |
| Ti-bulk-3:1   | -0.548 | -1.009 | 0.659 | 1.457 |
| Ti-first-1:1  | -0.489 | -1.195 | 0.944 | 0.786 |
| Ti-first-3:1  | -0.656 | -1.734 | 0.759 | 1.125 |
| Ti-second-1:1 | -0.610 | -1.104 | 0.690 | 0.854 |
| Ti-second-3:1 | -0.592 | -1.471 | 0.855 | 0.875 |
| V-bulk-1:1    | -0.507 | -1.336 | 0.852 | 0.476 |
| V-bulk-3:1    | -0.514 | -1.075 | 0.753 | 1.316 |
| V-first-1:1   | -0.507 | -1.694 | 0.981 | 1.008 |
| V-first-3:1   | -0.520 | -1.738 | 0.649 | 1.215 |
| V-second-1:1  | -0.633 | -1.216 | 0.693 | 1.265 |
| V-second-3:1  | -0.594 | -1.512 | 0.875 | 1.117 |
| W-bulk-1:1    | -0.457 | -1.000 | 0.836 | 0.870 |
| W-bulk-3:1    | -0.487 | -1.006 | 1.084 | 0.776 |
| W-first-1:1   | -0.537 | -1.657 | 1.083 | 1.033 |
| W-first-3:1   | -0.553 | -1.535 | 0.773 | 0.935 |
| W-second-1:1  | -0.616 | -1.215 | 0.726 | 1.071 |
| W-second-3:1  | -0.610 | -1.439 | 0.870 | 0.925 |
| Y-bulk-1:1    | -0.569 | -1.139 | 0.837 | 1.122 |
| Y-bulk-3:1    | -0.560 | -1.029 | 0.701 | 1.415 |
| Y-first-1:1   | -0.464 | -1.149 | 0.842 | 1.053 |
| Y-first-3:1   | -0.543 | -1.043 | 0.898 | 1.126 |
| Y-second-1:1  | -0.592 | -1.214 | 0.732 | 1.072 |
| Y-second-3:1  | -0.553 | -1.203 | 0.969 | 0.988 |
| Zn-bulk-1:1   | -0.473 | -0.989 | 0.862 | 1.116 |
| Zn-bulk-3:1   | -0.566 | -1.062 | 1.056 | 1.234 |
| Zn-first-1:1  | -0.466 | -1.756 | 0.965 | 1.133 |
| Zn-first-3:1  | -0.537 | -1.584 | 0.672 | 1.115 |
| Zn-second-1:1 | -0.584 | -1.256 | 0.713 | 1.198 |
| Zn-second-3:1 | -0.596 | -1.607 | 0.980 | 1.014 |
| Zr-bulk-1:1   | -0.533 | -1.136 | 0.878 | 0.804 |

|               |        |        |       |       |
|---------------|--------|--------|-------|-------|
| Zr-bulk-3:1   | -0.548 | -1.015 | 0.883 | 1.074 |
| Zr-first-1:1  | -0.504 | -1.256 | 0.862 | 0.946 |
| Zr-first-3:1  | -0.531 | -1.124 | 0.774 | 1.049 |
| Zr-second-1:1 | -0.635 | -1.329 | 0.682 | 1.032 |
| Zr-second-3:1 | -0.590 | -1.328 | 0.922 | 0.910 |

**Table S13. The RMSE and R<sup>2</sup> score of four ML methods**

| C <sub>3</sub> H <sub>8</sub> adsorption energy |            |                       |           |                      |
|-------------------------------------------------|------------|-----------------------|-----------|----------------------|
|                                                 | RMSE-train | R <sup>2</sup> -train | RMSE-test | R <sup>2</sup> -test |
| GBR                                             | 0.01       | 0.98                  | 0.03      | 0.84                 |
| RFR                                             | 0.03       | 0.92                  | 0.12      | 0.24                 |
| KNR                                             | 0.06       | 0.35                  | 0.13      | 0.25                 |
| ABR                                             | 0.03       | 0.84                  | 0.10      | 0.23                 |
| C <sub>3</sub> H <sub>6</sub> adsorption energy |            |                       |           |                      |
|                                                 | RMSE-train | R <sup>2</sup> -train | RMSE-test | R <sup>2</sup> -test |
| GBR                                             | 0.01       | 0.91                  | 0.07      | 0.89                 |
| RFR                                             | 0.01       | 0.90                  | 0.24      | 0.22                 |
| KNR                                             | 0.24       | 0.35                  | 0.17      | 0.53                 |
| ABR                                             | 0.09       | 0.89                  | 0.18      | 0.40                 |
| C-H bond activation barrier                     |            |                       |           |                      |
|                                                 | RMSE-train | R <sup>2</sup> -train | RMSE-test | R <sup>2</sup> -test |
| GBR                                             | 0.03       | 0.98                  | 0.07      | 0.82                 |
| RFR                                             | 0.06       | 0.90                  | 0.11      | 0.59                 |
| KNR                                             | 0.15       | 0.46                  | 0.12      | 0.52                 |
| ABR                                             | 0.09       | 0.80                  | 0.13      | 0.43                 |

**Table S14. Training features in construction of SISSO model**

|    | R <sub>E8</sub> | R <sub>E6</sub> | I <sub>m</sub> | N <sub>m</sub> | H <sub>fm</sub> | H <sub>Vm</sub> | χ     |
|----|-----------------|-----------------|----------------|----------------|-----------------|-----------------|-------|
| Ga | -0.07           | 0.37            | 5.999          | 1.81           | 0.058           | 2.653           | 0.300 |
| Co | 0.46            | 0.5             | 7.881          | 1.88           | 0.168           | 3.887           | 0.660 |
| V  | -0.04           | 0.12            | 6.746          | 1.63           | 0.236           | 4.695           | 0.524 |
| Cu | 0.05            | 0.83            | 7.727          | 1.9            | 0.136           | 3.110           | 1.227 |
| Zn | 0.4             | 0.56            | 9.394          | 1.65           | 0.076           | 1.233           | 0.000 |
| Ag | -0.11           | 0.5             | 7.576          | 1.93           | 0.117           | 2.643           | 1.302 |

|    |                 |                 |                |                |                  |        |         |
|----|-----------------|-----------------|----------------|----------------|------------------|--------|---------|
| Ru | -0.03           | 0.08            | 7.361          | 2.2            | 0.266            | 6.012  | 1.050   |
| Pd | -0.09           | 0.35            | 8.337          | 2.2            | 0.173            | 3.939  | 0.557   |
| Au | -0.17           | 0.73            | 9.225          | 2.54           | 0.130            | 3.421  | 2.309   |
| Sn | 0.07            | 0.46            | 7.344          | 1.96           | 0.073            | 3.006  | 1.112   |
| Nb | 0.29            | 0.64            | 6.759          | 1.6            | 0.278            | 7.152  | 0.892   |
| Tc | 0.13            | 0.72            | 7.280          | 1.9            | 0.238            | 5.701  | 0.549   |
| Sc | -0.37           | 0.71            | 6.562          | 1.36           | 0.166            | 3.296  | 0.188   |
| Ni | -0.47           | 0.67            | 7.640          | 1.91           | 0.178            | 3.918  | 1.161   |
| Ru | -0.45           | 0.78            | 7.361          | 2.2            | 0.266            | 6.012  | 1.050   |
| Ti | -0.34           | 0.05            | 6.828          | 1.54           | 0.194            | 4.405  | 0.079   |
| Rh | 0.58            | 0.73            | 7.459          | 2.28           | 0.225            | 5.131  | 1.137   |
| Hg | 0.15            | 0.55            | 10.438         | 2              | 0.024            | 0.614  | 0.000   |
| Pt | -0.32           | 0.15            | 9.020          | 2.28           | 0.207            | 5.079  | 2.128   |
| In | -0.09           | 0.2             | 5.786          | 1.78           | 0.034            | 2.384  | 0.300   |
|    | R <sub>Sm</sub> | R <sub>Dm</sub> | r <sub>d</sub> | e <sub>d</sub> | N <sub>dsm</sub> | ρ      | M       |
| Ga | 1.058           | 0.285           | 1.3            | 10             | 12               | 5.904  | 69.723  |
| Co | 1.32            | 0.36            | 1.35           | 7              | 9                | 8.9    | 58.933  |
| V  | 1.54            | 0.48            | 1.35           | 3              | 5                | 6.11   | 50.942  |
| Cu | 1.37            | 0.33            | 1.35           | 10             | 11               | 8.92   | 63.546  |
| Zn | 1.2             | 0.3             | 1.35           | 10             | 12               | 7.14   | 65.380  |
| Ag | 1.53            | 0.55            | 1.6            | 10             | 11               | 10.49  | 107.868 |
| Ru | 1.65            | 0.64            | 1.3            | 7              | 8                | 12.37  | 101.070 |
| Pd | 1.56            | 0.58            | 1.4            | 10             | 10               | 12.023 | 106.420 |
| Au | 1.56            | 0.64            | 1.35           | 10             | 11               | 19.3   | 196.966 |
| Sn | 1.139           | 0.468           | 1.45           | 10             | 12               | 7.31   | 118.710 |
| Nb | 1.82            | 0.79            | 1.45           | 4              | 5                | 8.57   | 92.906  |
| Tc | 1.57            | 0.67            | 1.35           | 5              | 7                | 11.5   | 98.000  |
| Sc | 1.72            | 0.59            | 1.6            | 1              | 3                | 2.985  | 44.955  |
| Ni | 1.28            | 0.34            | 1.35           | 8              | 10               | 8.908  | 58.693  |
| Ru | 1.65            | 0.64            | 1.3            | 7              | 8                | 12.37  | 101.070 |
| Ti | 1.62            | 0.53            | 1.4            | 2              | 4                | 4.507  | 47.867  |
| Rh | 1.6             | 0.6             | 1.35           | 8              | 9                | 12.45  | 102.905 |
| Hg | 1.42            | 0.61            | 1.5            | 10             | 12               | 13.534 | 200.590 |
| Pt | 1.59            | 0.66            | 1.35           | 9              | 10               | 21.09  | 195.084 |
| In | 1.234           | 0.491           | 1.55           | 10             | 12               | 7.31   | 114.818 |

**Table S15. Prediction energy barrier of 4D SISSO model**

| Surface            | Propane to 2-propyl | Propylene to 2-propenyl |
|--------------------|---------------------|-------------------------|
| Ag-bulk-1:1        | 0.757               | 1.246                   |
| Ag-bulk-3:1        | 0.678               | 1.264                   |
| Ag-firstlayer-1:1  | 0.659               | 0.978                   |
| Ag-firstlayer-3:1  | 0.677               | 1.085                   |
| Ag-secondlayer-1:1 | 0.723               | 1.003                   |
| Ag-secondlayer-3:1 | 0.668               | 0.868                   |
| Au-bulk-1:1        | 0.681               | 1.145                   |
| Au-bulk-3:1        | 0.591               | 0.669                   |
| Au-first-1:1       | 0.594               | 0.867                   |
| Au-first-3:1       | 0.577               | 0.991                   |
| Au-second-1:1      | 0.680               | 0.892                   |
| Au-second-3:1      | 0.652               | 0.733                   |
| Cd-bulk-1:1        | 0.777               | 1.222                   |
| Cd-bulk-3:1        | 0.755               | 1.312                   |
| Cd-first-1:1       | 0.752               | 1.317                   |
| Cd-first-3:1       | 0.785               | 1.278                   |
| Cd-second-1:1      | 0.806               | 1.402                   |
| Cd-second-3:1      | 0.769               | 1.187                   |
| Co-bulk-1:1        | 0.893               | 1.058                   |
| Co-bulk-3:1        | 0.797               | 0.855                   |
| Co-first-1:1       | 0.588               | 0.863                   |
| Co-first-3:1       | 0.585               | 0.749                   |
| Co-second-1:1      | 0.781               | 0.912                   |
| Co-second-3:1      | 0.633               | 0.986                   |
| Cr-bulk-1:1        | 0.775               | 0.981                   |
| Cr-bulk-3:1        | 0.750               | 0.986                   |
| Cr-first-1:1       | 0.698               | 0.880                   |
| Cr-first-3:1       | 0.696               | 0.994                   |
| Cr-second-1:1      | 0.732               | 0.932                   |
| Cr-second-3:1      | 0.705               | 1.080                   |
| Cu-bulk-1:1        | 0.700               | 1.061                   |
| Cu-bulk-3:1        | 0.714               | 1.402                   |
| Cu-first-1:1       | 0.457               | 0.920                   |
| Cu-second-1:1      | 0.461               | 0.945                   |
| Cu-second-3:1      | 0.744               | 0.915                   |
| Fe-bulk-1:1        | 0.653               | 1.082                   |
| Fe-bulk-3:1        | 0.760               | 1.000                   |
| Fe-first-1:1       | 0.709               | 0.879                   |
| Fe-first-3:1       | 0.648               | 1.072                   |

|                |       |       |
|----------------|-------|-------|
| Fe-second-1:1  | 0.652 | 0.932 |
| Fe-second-3:1  | 0.693 | 0.848 |
| Ga-bulk-3:1    | 0.614 | 0.924 |
| Ga-first-1:1   | 0.556 | 0.793 |
| Ga-first-3:1   | 0.575 | 1.108 |
| Ga-second-1: 1 | 0.586 | 0.895 |
| Ga-second-3:1  | 0.811 | 0.663 |
| Ge-bulk-3:1    | 0.591 | 0.844 |
| Ge-first-1:1   | 0.588 | 0.858 |
| Ge-first-3:1   | 0.465 | 0.995 |
| Ge-second-1:1  | 0.465 | 0.856 |
| Ge-second-3:1  | 0.489 | 0.746 |
| Hf-bulk-1:1    | 0.786 | 0.642 |
| Hf-bulk-3:1    | 0.802 | 1.015 |
| Hf-first-1:1   | 0.810 | 0.848 |
| Hf-first-3:1   | 0.784 | 0.868 |
| Hf-second-1:1  | 0.765 | 0.920 |
| Hf-second-3:1  | 0.812 | 0.800 |
| Hg-bulk-3:1    | 0.641 | 1.389 |
| Hg-first-1:1   | 0.690 | 1.307 |
| Hg-first-3:1   | 0.746 | 1.361 |
| Hg-second-1:1  | 0.736 | 1.345 |
| Hg-second-3:1  | 0.828 | 1.268 |
| In-bulk-3:1    | 0.756 | 1.346 |
| In-first-1:1   | 0.757 | 1.249 |
| In-first-3:1   | 0.819 | 0.858 |
| In-second-1:1  | 0.755 | 1.083 |
| In-second-3:1  | 0.879 | 0.738 |
| Ir-bulk-1: 1   | 0.725 | 1.031 |
| Ir-bulk-3: 1   | 0.735 | 0.970 |
| Ir-first-1:1   | 0.712 | 1.112 |
| Ir-first-3:1   | 0.706 | 0.841 |
| Ir-second-1:1  | 0.705 | 1.119 |
| Ir-second-3:1  | 0.758 | 0.920 |
| Mn-bulk-1: 1   | 0.784 | 1.341 |
| Mn-bulk-3: 1   | 0.817 | 1.364 |
| Mn-first-1:1   | 0.787 | 1.087 |
| Mn-first-3:1   | 0.776 | 1.395 |
| Mn-second-1:1  | 0.776 | 1.090 |
| Mn-second-3:1  | 0.796 | 1.118 |
| Mo-bulk-1:1    | 0.735 | 0.551 |
| Mo-bulk-3:1    | 0.804 | 0.749 |
| Mo-first-1:1   | 0.787 | 0.736 |
| Mo-first-3:1   | 0.723 | 1.043 |

|               |       |       |
|---------------|-------|-------|
| Mo-second-1:1 | 0.733 | 0.795 |
| Mo-second-3:1 | 0.795 | 0.784 |
| Nb-bulk-1:1   | 0.646 | 0.399 |
| Nb-bulk-3:1   | 0.822 | 0.658 |
| Nb-first-1:1  | 0.962 | 0.729 |
| Nb-first-3:1  | 0.673 | 1.033 |
| Nb-second-1:1 | 0.631 | 0.782 |
| Nb-second-3:1 | 0.780 | 0.772 |
| Ni-bulk-1:1   | 0.830 | 0.980 |
| Ni-bulk-3:1   | 0.694 | 1.026 |
| Ni-first-1:1  | 0.666 | 0.950 |
| Ni-first-3:1  | 0.562 | 1.118 |
| Ni-second-1:1 | 0.553 | 1.006 |
| Ni-second-3:1 | 0.733 | 0.874 |
| Os-bulk-1: 1  | 0.717 | 0.838 |
| Os-bulk-3: 1  | 0.775 | 0.709 |
| Os-first-1:1  | 0.763 | 0.883 |
| Os-first-3:1  | 0.743 | 0.704 |
| Os-second-1:1 | 0.696 | 0.892 |
| Os-second-3:1 | 0.770 | 0.700 |
| Pb-bulk-3:1   | 0.637 | 1.527 |
| Pb-first-1:1  | 0.642 | 1.253 |
| Pb-first-3:1  | 0.696 | 1.396 |
| Pb-second-1:1 | 0.695 | 1.253 |
| Pb-second-3:1 | 0.726 | 0.993 |
| Pd-bulk-1:1   | 0.724 | 0.945 |
| Pd-bulk-3:1   | 0.629 | 1.166 |
| Pd-first-1:1  | 0.661 | 0.790 |
| Pd-first-3:1  | 0.532 | 0.867 |
| Pd-second-1:1 | 0.529 | 0.843 |
| Pd-second-3:1 | 0.667 | 0.875 |
| Rh-bulk-1: 1  | 0.581 | 1.352 |
| Rh-bulk-3: 1  | 0.764 | 1.355 |
| Rh-first-1:1  | 0.698 | 1.085 |
| Rh-first-3:1  | 0.556 | 1.067 |
| Rh-second-1:1 | 0.584 | 1.132 |
| Rh-second-3:1 | 0.683 | 0.982 |
| Ru-bulk-1:1   | 0.713 | 1.282 |
| Ru-bulk-3:1   | 0.773 | 0.707 |
| Ru-first-1:1  | 0.668 | 0.789 |
| Ru-first-3:1  | 0.525 | 0.665 |
| Ru-second-1:1 | 0.448 | 0.860 |
| Ru-second-3:1 | 0.706 | 0.763 |
| Sc-bulk-1: 1  | 0.697 | 0.736 |

|               |       |       |
|---------------|-------|-------|
| Sc-bulk-3: 1  | 0.716 | 1.150 |
| Sc-first-1:1  | 0.730 | 0.815 |
| Sc-first-3:1  | 0.687 | 0.889 |
| Sc-second-1:1 | 0.643 | 0.887 |
| Sc-second-3:1 | 0.730 | 0.745 |
| Sn-bulk-3:1   | 0.622 | 1.035 |
| Sn-first-1:1  | 0.683 | 1.463 |
| Sn-first-3:1  | 0.775 | 1.566 |
| Sn-second-1:1 | 0.656 | 1.268 |
| Sn-second-3:1 | 0.743 | 0.915 |
| Ta-bulk-1: 1  | 0.816 | 0.428 |
| Ta-bulk-3: 1  | 0.815 | 0.783 |
| Ta-first-1:1  | 0.817 | 0.556 |
| Ta-first-3:1  | 0.800 | 0.581 |
| Ta-second-1:1 | 0.743 | 0.619 |
| Ta-second-3:1 | 0.815 | 0.521 |
| Tc-bulk-1:1   | 0.674 | 0.736 |
| Tc-bulk-3:1   | 0.911 | 0.845 |
| Tc-first-1:1  | 0.791 | 0.788 |
| Tc-first-3:1  | 0.575 | 0.784 |
| Tc-second-1:1 | 0.580 | 0.874 |
| Tc-second-3:1 | 0.742 | 0.748 |
| Ti-bulk-1:1   | 0.602 | 0.872 |
| Ti-bulk-3:1   | 0.570 | 1.667 |
| Ti-first-1:1  | 0.769 | 0.723 |
| Ti-first-3:1  | 0.620 | 1.086 |
| Ti-second-1:1 | 0.583 | 0.784 |
| Ti-second-3:1 | 0.707 | 0.804 |
| V-bulk-1:1    | 0.723 | 0.535 |
| V-bulk--3:1   | 0.619 | 1.404 |
| V-first-1:1   | 0.830 | 0.960 |
| V-first-3:1   | 0.548 | 1.237 |
| V-second-1:1  | 0.573 | 1.318 |
| V-second-3:1  | 0.744 | 1.096 |
| W-bulk-1: 1   | 0.729 | 0.535 |
| W-bulk-3: 1   | 0.782 | 0.452 |
| W-first-1:1   | 0.781 | 0.708 |
| W-first-3:1   | 0.705 | 0.600 |
| W-second-1:1  | 0.682 | 0.754 |
| W-second-3:1  | 0.738 | 0.589 |
| Y-bulk-1: 1   | 0.755 | 1.018 |
| Y-bulk-3: 1   | 0.749 | 1.513 |
| Y-first-1:1   | 0.756 | 0.930 |

---

**Table S16. The identified equation from SISO models for activation of propane and propene.**

| Equation for E <sub>b8</sub> predicted based on SISO analysis |                                                                                                                                                                                                                                                                    |
|---------------------------------------------------------------|--------------------------------------------------------------------------------------------------------------------------------------------------------------------------------------------------------------------------------------------------------------------|
| 1D                                                            | $\frac{0.021 \times R_E \times \ln N_{dsm}}{N_{dsm}} + 0.855$                                                                                                                                                                                                      |
| 2D                                                            | $\frac{0.187 \times R_E}{r_d \times \ln r_d} - \frac{0.869 \times (N_m - H_{fm})}{\sqrt[3]{M}} + 0.012$                                                                                                                                                            |
| 3D                                                            | $\frac{0.44 \times R_E \times N_m}{r_d^2} - \frac{0.012 \times (N_m - H_{fm})}{\sqrt[3]{M}} + \frac{0.005 \times N_{dsm} \times  R_E - H_{fm} }{R_{Dm}} + 0.011$                                                                                                   |
| 5D                                                            | $\frac{0.184 \times R_E}{r_d \times \ln r_d} - \frac{0.0198 \times I_m \times N_m^3}{\rho} - \frac{0.011 \times N_m^3 \times r_d}{M} + \frac{0.018 \times R_E^3}{R_{sm} - r_d} + 0.278 \times  R_E^2 - H_{fm}^2  + 0.011$                                          |
| Equation for E <sub>b6</sub> predicted based on SISO analysis |                                                                                                                                                                                                                                                                    |
| 1D                                                            | $\frac{0.022 \times \ln N_m}{N_m - R_E} + 0.086$                                                                                                                                                                                                                   |
| 2D                                                            | $\frac{0.023 \times \ln N_m}{N_m - R_E} - 0.023 \times  r_d - R_{sm} ^3 + 0.138$                                                                                                                                                                                   |
| 3D                                                            | $\frac{0.023 \times \ln N_m}{N_m - R_E} - \frac{0.00003 \times r_d \times e^{-H_{vm}}}{R_E} - \frac{0.017 \times \ln R_{Dm}}{H_{fm} - R_E} + 0.094$                                                                                                                |
| 5D                                                            | $\frac{0.021 \times R_E \times \ln N_m}{N_m} - \frac{0.716 \times N_{dsm} \times  r_d - R_{sm} }{N_{dsm}} + \frac{0.02 \times \chi}{M \times  R_E - H_{fm} } - 0.038 \times  \chi^2 - H_{fm} \times H_{vm}  + \frac{0.012 \times \ln R_E}{ r_d - R_{sm} } + 0.922$ |

**Table S17. The energy barrier of forward (fwd) and backward (bwd), rate constant, and pre-factor of elementary reaction at 800K on Pt(111). Ads and Des represent adsorption and desorption reactions**

|     | reactions                                                                                                      | DFT  |      | Rate constant        |                       | Pre-factor            |                       |
|-----|----------------------------------------------------------------------------------------------------------------|------|------|----------------------|-----------------------|-----------------------|-----------------------|
|     |                                                                                                                | fwd  | bwd  | fwd                  | bwd                   | fwd                   | bwd                   |
| Ads | CH <sub>3</sub> CH <sub>2</sub> CH <sub>3</sub> + * → CH <sub>3</sub> CH <sub>2</sub> CH <sub>3</sub> *        | —    | —    | 1.40×10 <sup>8</sup> | 5.92×10 <sup>15</sup> | 1.40×10 <sup>8</sup>  | 1.10×10 <sup>19</sup> |
| R1  | CH <sub>3</sub> CH <sub>2</sub> CH <sub>3</sub> + 2 * → CH <sub>3</sub> CH <sub>2</sub> CH <sub>2</sub> * + H* | 0.93 | 0.81 | 2.07×10 <sup>6</sup> | 2.36×10 <sup>7</sup>  | 1.92×10 <sup>13</sup> | 1.92×10 <sup>13</sup> |
| R2  | CH <sub>3</sub> CH <sub>2</sub> CH <sub>3</sub> + 2 * → CH <sub>3</sub> CHCH <sub>3</sub> * + H*               | 0.94 | 0.76 | 1.53×10 <sup>7</sup> | 3.92×10 <sup>9</sup>  | 1.92×10 <sup>13</sup> | 1.92×10 <sup>13</sup> |
| R3  | CH <sub>3</sub> CH <sub>2</sub> CH <sub>2</sub> * + * → CH <sub>3</sub> CH <sub>2</sub> CH* + H*               | 0.96 | 0.63 | 8.51×10 <sup>6</sup> | 2.33×10 <sup>12</sup> | 1.92×10 <sup>13</sup> | 1.92×10 <sup>13</sup> |
| R4  | CH <sub>3</sub> CH <sub>2</sub> CH <sub>2</sub> * + * → CH <sub>3</sub> CHCH <sub>2</sub> * + H*               | 0.93 | 0.85 | 3.75×10 <sup>9</sup> | 1.58×10 <sup>11</sup> | 1.92×10 <sup>13</sup> | 1.92×10 <sup>13</sup> |
| R5  | CH <sub>3</sub> CHCH <sub>3</sub> * + * → CH <sub>3</sub> CHCH <sub>2</sub> * + H*                             | 0.96 | 0.99 | 4.89×10 <sup>5</sup> | 3.14×10 <sup>8</sup>  | 1.92×10 <sup>13</sup> | 1.92×10 <sup>13</sup> |
| R6  | CH <sub>3</sub> CHCH <sub>3</sub> * + * → CH <sub>3</sub> CCH <sub>3</sub> * + H*                              | 1.08 | 0.75 | 4.59×10 <sup>6</sup> | 1.63×10 <sup>12</sup> | 1.92×10 <sup>13</sup> | 1.92×10 <sup>13</sup> |
| R9  | CH <sub>3</sub> CHCH <sub>2</sub> * + * → CH <sub>3</sub> CHCH* + H*                                           | 0.56 | 1.08 | 1.00×10 <sup>5</sup> | 9.83×10 <sup>9</sup>  | 1.92×10 <sup>13</sup> | 1.92×10 <sup>13</sup> |
| R10 | CH <sub>3</sub> CHCH <sub>2</sub> * + * → CH <sub>3</sub> CCH <sub>2</sub> * + H*                              | 1.04 | 0.76 | 5.05×10 <sup>4</sup> | 4.28×10 <sup>10</sup> | 1.92×10 <sup>13</sup> | 1.92×10 <sup>13</sup> |
| R11 | CH <sub>3</sub> CCH <sub>3</sub> * + * → CH <sub>3</sub> CCH <sub>2</sub> * + H*                               | 1.09 | 0.89 | 4.13×10 <sup>6</sup> | 2.66×10 <sup>8</sup>  | 1.92×10 <sup>13</sup> | 1.92×10 <sup>13</sup> |
| R13 | CH <sub>3</sub> CHCH* + * → CH <sub>3</sub> CHC* + H*                                                          | 0.83 | 0.93 | 8.02×10 <sup>6</sup> | 1.39×10 <sup>9</sup>  | 1.92×10 <sup>13</sup> | 1.92×10 <sup>13</sup> |
| R14 | CH <sub>3</sub> CHCH* + * → CH <sub>3</sub> CCH* + H*                                                          | 1.38 | 1.19 | 8.58×10 <sup>9</sup> | 6.75×10 <sup>9</sup>  | 1.92×10 <sup>13</sup> | 1.92×10 <sup>13</sup> |
| R15 | CH <sub>3</sub> CCH <sub>2</sub> * + * → CH <sub>3</sub> CCH* + H*                                             | 1.07 | 0.88 | 3.04×10 <sup>9</sup> | 3.22×10 <sup>10</sup> | 1.92×10 <sup>13</sup> | 1.92×10 <sup>13</sup> |
| R16 | CH <sub>3</sub> CHC* + * → CH <sub>3</sub> CC* + H*                                                            | 1.15 | 0.78 | 3.72×10 <sup>6</sup> | 1.25×10 <sup>10</sup> | 1.92×10 <sup>13</sup> | 1.92×10 <sup>13</sup> |
| R17 | CH <sub>3</sub> CCH* + * → CH <sub>3</sub> CC* + H*                                                            | 1.53 | 0.44 | 7.27×10 <sup>3</sup> | 2.08×10 <sup>9</sup>  | 1.92×10 <sup>13</sup> | 1.92×10 <sup>13</sup> |
| R23 | CH <sub>3</sub> CCH <sub>3</sub> * + * → CH <sub>3</sub> * + CH <sub>3</sub> C*                                | 1.68 | 0.59 | 2.86×10 <sup>3</sup> | 9.09×10 <sup>4</sup>  | 1.92×10 <sup>13</sup> | 1.92×10 <sup>13</sup> |
| R26 | CH <sub>3</sub> CCH <sub>2</sub> * + * → CH <sub>2</sub> * + CH <sub>3</sub> C*                                | 1.45 | 1.77 | 2.62×10 <sup>1</sup> | 3.49×10 <sup>8</sup>  | 1.92×10 <sup>13</sup> | 1.92×10 <sup>13</sup> |
| R28 | CH <sub>3</sub> CCH* + * → CH* + CH <sub>3</sub> C*                                                            | 1.78 | 1.73 | 1.47×10 <sup>3</sup> | 2.37×10 <sup>6</sup>  | 1.92×10 <sup>13</sup> | 1.92×10 <sup>13</sup> |



|                |                                           |      |      |                    |                       |                       |                       |
|----------------|-------------------------------------------|------|------|--------------------|-----------------------|-----------------------|-----------------------|
| H <sub>2</sub> | $H^* + H^* \rightarrow H_2^* + *$         | 1.45 | 1.69 | $3.60 \times 10^7$ | $6.15 \times 10^{10}$ | $1.92 \times 10^{13}$ | $1.92 \times 10^{13}$ |
| Des            | $CH_3CHCH_2^* \rightarrow CH_3CHCH_2 + *$ | —    | —    | $1.43 \times 10^8$ | $2.80 \times 10^{11}$ | $1.43 \times 10^8$    | $7.01 \times 10^{18}$ |
| Des            | $H_2^* \rightarrow H_2 + *$               | —    | —    | $6.58 \times 10^8$ | $9.02 \times 10^{14}$ | $6.58 \times 10^8$    | $4.11 \times 10^{15}$ |

**Table S18. The energy barrier of forward (fwd) and backward (bwd), rate constant, and pre-factor of elementary reaction at 800K on Pt<sub>3</sub>Mo(111). Ads and Des represent adsorption and desorption reactions**

|                | reactions                                             | DFT  |      | Rate constant         |                       | Pre-factor            |                       |
|----------------|-------------------------------------------------------|------|------|-----------------------|-----------------------|-----------------------|-----------------------|
|                |                                                       | fwd  | bwd  | fwd                   | bwd                   | fwd                   | bwd                   |
| Ads            | $CH_3CH_2CH_3 + * \rightarrow CH_3CH_2CH_3^*$         | —    | —    | $1.40 \times 10^8$    | $5.28 \times 10^{15}$ | $1.40 \times 10^8$    | $1.10 \times 10^{19}$ |
| R1             | $CH_3CH_2CH_3 + 2 * \rightarrow CH_3CH_2CH_2^* + H^*$ | 0.64 | 0.71 | $3.71 \times 10^7$    | $3.15 \times 10^6$    | $1.92 \times 10^{13}$ | $1.92 \times 10^{13}$ |
| R2             | $CH_3CH_2CH_3 + 2 * \rightarrow CH_3CHCH_3^* + H^*$   | 0.67 | 0.73 | $8.64 \times 10^6$    | $2.03 \times 10^8$    | $1.92 \times 10^{13}$ | $1.92 \times 10^{13}$ |
| R3             | $CH_3CH_2CH_2^* + * \rightarrow CH_3CH_2CH^* + H^*$   | 0.99 | 0.65 | $6.41 \times 10^5$    | $2.81 \times 10^{10}$ | $1.92 \times 10^{13}$ | $1.92 \times 10^{13}$ |
| R4             | $CH_3CH_2CH_2^* + * \rightarrow CH_3CHCH_2^* + H^*$   | 0.64 | 0.73 | $7.06 \times 10^9$    | $1.66 \times 10^9$    | $1.92 \times 10^{13}$ | $1.92 \times 10^{13}$ |
| R5             | $CH_3CHCH_3^* + * \rightarrow CH_3CHCH_2^* + H^*$     | 0.67 | 0.88 | $2.92 \times 10^6$    | $8.64 \times 10^6$    | $1.92 \times 10^{13}$ | $1.92 \times 10^{13}$ |
| R6             | $CH_3CHCH_3^* + * \rightarrow CH_3CCH_3^* + H^*$      | 1.21 | 0.67 | $1.86 \times 10^{13}$ | $1.21 \times 10^9$    | $1.92 \times 10^{13}$ | $1.92 \times 10^{13}$ |
| R9             | $CH_3CHCH_2^* + * \rightarrow CH_3CHCH^* + H^*$       | 1.10 | 0.58 | $1.64 \times 10^9$    | $4.30 \times 10^9$    | $1.92 \times 10^{13}$ | $1.92 \times 10^{13}$ |
| R10            | $CH_3CHCH_2^* + * \rightarrow CH_3CCH_2^* + H^*$      | 1.12 | 1.15 | $1.86 \times 10^6$    | $1.10 \times 10^6$    | $1.92 \times 10^{13}$ | $1.92 \times 10^{13}$ |
| R11            | $CH_3CCH_3^* + * \rightarrow CH_3CCH_2^* + H^*$       | 1.18 | 0.88 | $3.86 \times 10^{10}$ | $8.37 \times 10^8$    | $1.92 \times 10^{13}$ | $1.92 \times 10^{13}$ |
| R13            | $CH_3CHCH^* + * \rightarrow CH_3CHC^* + H^*$          | 1.01 | 0.67 | $4.02 \times 10^{11}$ | $1.21 \times 10^{10}$ | $1.92 \times 10^{13}$ | $1.92 \times 10^{13}$ |
| R14            | $CH_3CHCH^* + * \rightarrow CH_3CCH^* + H^*$          | 1.58 | 1.29 | $1.36 \times 10^{10}$ | $1.03 \times 10^8$    | $1.92 \times 10^{13}$ | $1.92 \times 10^{13}$ |
| R15            | $CH_3CCH_2^* + * \rightarrow CH_3CCH^* + H^*$         | 1.31 | 0.93 | $1.36 \times 10^{10}$ | $1.04 \times 10^9$    | $1.92 \times 10^{13}$ | $1.92 \times 10^{13}$ |
| R16            | $CH_3CHC^* + * \rightarrow CH_3CC^* + H^*$            | 1.34 | 0.87 | $2.14 \times 10^5$    | $6.56 \times 10^8$    | $1.92 \times 10^{13}$ | $1.92 \times 10^{13}$ |
| R17            | $CH_3CCH^* + * \rightarrow CH_3CC^* + H^*$            | 1.51 | 0.63 | $7.66 \times 10^6$    | $2.77 \times 10^{10}$ | $1.92 \times 10^{13}$ | $1.92 \times 10^{13}$ |
| R23            | $CH_3CCH_3^* + * \rightarrow CH_3^* + CH_3C^*$        | 1.67 | 1.33 | $7.80 \times 10^5$    | $2.58 \times 10^1$    | $1.92 \times 10^{13}$ | $1.92 \times 10^{13}$ |
| R26            | $CH_3CCH_2^* + * \rightarrow CH_2^* + CH_3C^*$        | 1.89 | 0.75 | $1.12 \times 10^5$    | $3.91 \times 10^{11}$ | $1.92 \times 10^{13}$ | $1.92 \times 10^{13}$ |
| R28            | $CH_3CCH^* + * \rightarrow CH^* + CH_3C^*$            | 2.60 | 1.10 | $3.69 \times 10^9$    | $1.72 \times 10^7$    | $1.92 \times 10^{13}$ | $1.92 \times 10^{13}$ |
| H <sub>2</sub> | $H^* + H^* \rightarrow H_2^* + *$                     | 0.91 | 0.39 | $6.88 \times 10^7$    | $7.69 \times 10^{11}$ | $1.92 \times 10^{13}$ | $1.92 \times 10^{13}$ |
| Des            | $CH_3CHCH_2^* \rightarrow CH_3CHCH_2 + *$             | —    | —    | $1.43 \times 10^8$    | $1.21 \times 10^{15}$ | $1.43 \times 10^8$    | $7.01 \times 10^{18}$ |
| Des            | $H_2^* \rightarrow H_2 + *$                           | —    | —    | $6.58 \times 10^8$    | $1.28 \times 10^{14}$ | $6.58 \times 10^8$    | $4.11 \times 10^{15}$ |

## References:

1. Nykänen, L.; Honkala, K., Density Functional Theory Study on Propane and Propene Adsorption on Pt(111) and PtSn Alloy Surfaces. *J. Phys. Chem. C* **2011**, *115*, 9578-9586.
2. Lian, Z.; Ali, S.; Liu, T.; Si, C.; Li, B.; Su, D. S., Revealing the Janus Character of the Coke Precursor in the Propane Direct Dehydrogenation on Pt Catalysts from a Kmc Simulation. *ACS Catal.* **2018**, *8*, 4694-4704.
3. Yang, M.-L.; Zhu, Y.-A.; Zhou, X.-G.; Sui, Z.-J.; Chen, D., First-Principles Calculations of Propane Dehydrogenation over PtSn Catalysts. *ACS Catal.* **2012**, *2*, 1247-1258.
4. Xiao, L.; Ma, F.; Zhu, Y. A.; Sui, Z. J.; Zhou, J. H.; Zhou, X. G.; Chen, D.; Yuan, W. K., Improved

Selectivity and Coke Resistance of Core-Shell Alloy Catalysts for Propane Dehydrogenation from First Principles and Microkinetic Analysis. *Chem. Eng. J.* **2019**, *377*, 1-37.

5. Zha, S.; Sun, G.; Wu, T.; Zhao, J.; Zhao, Z. J.; Gong, J., Identification of Pt-Based Catalysts for Propane Dehydrogenation Via a Probability Analysis. *Chem Sci* **2018**, *9*, 3925-3931.

6. Terzieff, P.; Komarek, K. L.; Wachtel, E., Magnetic-Properties of Liquid Au-in and Au-Ge Alloys. *Zeitschrift Fur Physikalische Chemie Neue Folge* **1988**, *156*, 563-567.

7. Yang, M.-L.; Zhu, Y.-A.; Fan, C.; Sui, Z.-J.; Chen, D.; Zhou, X.-G., Density Functional Study of the Chemisorption of C1, C2 and C3 Intermediates in Propane Dissociation on Pt(111). *J. Mol. Catal. A: Chem.* **2010**, *321*, 42-49.

8. Hook, A.; Celik, F. E., Predicting Selectivity for Ethane Dehydrogenation and Coke Formation Pathways over Model Pt-M Surface Alloys with Ab Initio and Scaling Methods. *J. Phys. Chem. C* **2017**, *121*, 17882-17892.

9. Wang, T.; Cui, X.; Winther, K. T.; Abild-Pedersen, F.; Bligaard, T.; Nørskov, J. K., Theory-Aided Discovery of Metallic Catalysts for Selective Propane Dehydrogenation to Propylene. *ACS Catal.* **2021**, *11*, 6290-6297.

10. Xiao, L.; Hu, P.; Sui, Z. J.; Chen, D.; Zhou, X. G.; Yuan, W. K.; Zhu, Y. A., Rational Design of Intermetallic Compound Catalysts for Propane Dehydrogenation from a Descriptor-Based Microkinetic Analysis. *J. Catal.* **2021**, *404*, 32-45.
